# Supplementary material
Source: ML conference proceedings conference paper supplement (https://openreview.net/forum?id=w1x9WMMHvi)
Supplement: supplementary_material [file Appendix.pdf › Appendix.pdf]

# Multivariate Time Series Anomaly Detection with Idempotent Reconstruction

## Appendix

### Contents

|          |                                                                       |           |
|----------|-----------------------------------------------------------------------|-----------|
| <b>1</b> | <b>Introduction</b>                                                   | <b>1</b>  |
| <b>2</b> | <b>Related Work</b>                                                   | <b>3</b>  |
| 2.1      | Multivariate Time Series Anomaly Detection . . . . .                  | 3         |
| 2.2      | Idempotent Generative Network . . . . .                               | 3         |
| <b>3</b> | <b>Method</b>                                                         | <b>3</b>  |
| 3.1      | Overview . . . . .                                                    | 3         |
| 3.2      | Problem Setting . . . . .                                             | 3         |
| 3.3      | Optimization Objective . . . . .                                      | 4         |
| 3.3.1    | Reconstruction Objective . . . . .                                    | 4         |
| 3.3.2    | Idempotent Objective . . . . .                                        | 4         |
| 3.3.3    | Tightness Objective . . . . .                                         | 5         |
| 3.3.4    | Final Objective . . . . .                                             | 6         |
| <b>4</b> | <b>Experiment</b>                                                     | <b>6</b>  |
| 4.1      | Experiment Setting . . . . .                                          | 6         |
| 4.1.1    | Dataset and Baseline . . . . .                                        | 6         |
| 4.1.2    | Implementation Detail . . . . .                                       | 6         |
| 4.1.3    | Evaluation Metric . . . . .                                           | 7         |
| 4.2      | Result . . . . .                                                      | 8         |
| 4.2.1    | Anomaly Detection w/ or w/o IGAD . . . . .                            | 8         |
| 4.2.2    | Balance of Robustness and Sensitivity . . . . .                       | 8         |
| 4.2.3    | Difference in Distributions of Abnormal Scores . . . . .              | 8         |
| 4.3      | Ablation Study . . . . .                                              | 9         |
| 4.3.1    | Different Loss Functions . . . . .                                    | 9         |
| 4.3.2    | The Effectiveness of Each Objective . . . . .                         | 9         |
| 4.4      | The Effect of IGAD on Foundational Models . . . . .                   | 10        |
| 4.5      | Comparison between Frequency Resampling and Time-Domain PCA . . . . . | 10        |
| <b>5</b> | <b>Conclusion</b>                                                     | <b>10</b> |
| <b>A</b> | <b>Theoretical Analysis of <i>Over Generalization</i></b>             | <b>25</b> |
| A.1      | Contaminated Data for Training and Over Expressive Models . . . . .   | 25        |
| A.2      | Optimization Dynamics with Regularization Constraint . . . . .        | 25        |
| A.3      | Mechanistic Interpretation of Over Generalization . . . . .           | 26        |

|          |                                                                                 |           |
|----------|---------------------------------------------------------------------------------|-----------|
| A.3.1    | Density-Driven Error Scaling . . . . .                                          | 26        |
| A.3.2    | Latent Manifold Attraction . . . . .                                            | 27        |
| <b>B</b> | <b>Proof of the convergence for IGAD</b>                                        | <b>28</b> |
| <b>C</b> | <b>Explanations for Basic Models</b>                                            | <b>29</b> |
| C.1      | Models Designed for MTS AD . . . . .                                            | 29        |
| C.2      | Time Series Foundation Model . . . . .                                          | 31        |
| <b>D</b> | <b>Hyperparameter Setting</b>                                                   | <b>33</b> |
| <b>E</b> | <b>More Detailed Experimental Results</b>                                       | <b>34</b> |
| E.1      | Distinguishable Distributions of Anomaly Scores and Auxiliary Metrics . . . . . | 34        |
| E.2      | Efficiency Evaluation . . . . .                                                 | 43        |
| E.3      | Hyperparameter Analysis . . . . .                                               | 45        |
| E.4      | Visualization of Latent Space . . . . .                                         | 48        |
| E.5      | Maintain Data Patterns under Noise . . . . .                                    | 49        |
| E.6      | Nyquist Criteria . . . . .                                                      | 53        |
| E.7      | Comparison with Contrastive-based Models . . . . .                              | 58        |
| E.8      | Codes for IGAD . . . . .                                                        | 59        |
| <b>F</b> | <b>Limitation and Future Work</b>                                               | <b>59</b> |
| <b>G</b> | <b>Impact Statements</b>                                                        | <b>59</b> |

---

## A Theoretical Analysis of Over Generalization

As we have discussed in Sect.1, we conclude the reasons for over generalization as that this problem may happen for two factors:

- A model incorrectly captures the intrinsic patterns of abnormal series in a contaminated dataset for training. This is **unavoidable** in real-world scenarios because large amounts of time series data are collected under the assumption that all time instances collected are normal points, since a system typically operates correctly under most conditions. However, it is inevitable that the system will have offsets or abnormal states over the long period of the data collection process. Meanwhile, since manually checking each time point for anomalies consumes a lot of human and time resources, these abnormal instances remain in the dataset for training without label scrutiny.
- A model has an excessive decoding power, even for abnormal series. This means that a model not only learns how to reconstruct normal time instances but also gains the ability to learn how to reconstruct abnormal instances.

In this part, we provide mathematical proofs and analysis for over generalization to explore how these two factors have an effect on the training process. Concretely, in Sect.A.1, we show the explanations in ideal and pure models, which have enough model capacity to learn everything. In addition, in Sect.A.2, we provide proofs and analysis in more general cases, and the effect of *regularization* is introduced, which aligns with the traditional principles of model design.

### A.1 Contaminated Data for Training and Over Expressive Models

Let  $\mathcal{P}_x$  and  $\mathcal{P}_a$  denote the distributions of normal and abnormal instances, respectively. When training data contains contaminated anomalies with rate  $\eta \in [0, 1)$ , the empirical distribution will be transformed to  $\mathcal{P}_{\text{train}} = (1 - \eta)\mathcal{P}_x + \eta\mathcal{P}_a$ . A reconstruction-based model  $f : \mathcal{X} \rightarrow \mathcal{X}$  trained on the contaminated data aims to minimize the composite objective:

$$\mathcal{L}_{\text{recon}}(f(\cdot)) = (1 - \eta)\mathbb{E}_{x \sim \mathcal{P}_x} [\|x - f(x)\|_2^2] + \eta\mathbb{E}_{x \sim \mathcal{P}_a} [\|x - f(x)\|_2^2]. \quad (15)$$

Here, we consider a compact support  $K \subset \mathcal{X}$  where  $\text{Supp}(\mathcal{P}_x) \cup \text{Supp}(\mathcal{P}_a) \subseteq K$  and  $\mathcal{P}_x, \mathcal{P}_a$  are absolutely continuous on  $K$ . By the universal approximation theorem [22], in a given assumption space  $\mathcal{H}$ , for any compact support  $K \subset \mathcal{X}$  containing both normal and anomalous instances, there exists a neural network  $f \in \mathcal{H}$ , which can satisfy the following objective:

$$\sup_{x \in K} \|x - f(x)\|_2^2 \leq \epsilon, \quad \forall \epsilon > 0. \quad (16)$$

This implies that sufficiently expressive models can achieve arbitrarily small reconstruction errors on both distributions simultaneously. This theoretical capacity relies on the complexity of the unbounded model. Practical architectures with inductive biases, for example, the commonly selected bottleneck constraint, and other implicit regularization introduced during the design of the model alter the solution landscape.

### A.2 Optimization Dynamics with Regularization Constraint

For more general cases in practice, when  $\eta > 0$ , we consider an encoder-decoder-like mapping function  $f_\theta(x) = g_\phi(h_\psi(x))$  with a bottleneck dimension sufficiently smaller than the data dimension, that is,  $d_{\text{bottleneck}} \ll d_{\text{data}}$ , which enforces information compression. This is a demonstrated strategy in this type of structures because it enforces the learning of compressed representations that retain the intrinsic structure of the data while discarding redundant information [21, 38], thus preventing trivial identity mappings [5] and promoting robust feature disentanglement [20]. In terms of Eq.(15), the optimization dynamics is governed by:

$$(1 - \eta)\nabla_\theta \mathbb{E}_x [\|x - f_\theta(x)\|_2^2] + \eta\nabla_\theta \mathbb{E}_{x'} [\|x' - f_\theta(x')\|_2^2] + \gamma\nabla_\theta \mathcal{R}(\theta) = 0, \quad (17)$$

where  $\mathcal{R}(\theta)$  captures architectural constraints through implicit regularization and  $\gamma$  quantifies the effective regularization strength from the bottleneck. To elucidate this equilibrium, more generally, we expanding the loss in the parameter space with  $\mathcal{R}(\theta)$ :

$$\mathcal{L}_{\text{recon}}(f_\theta) = \int_K \|x - f_\theta(x)\|_2^2 [(1 - \eta)\mathcal{P}_x(x) + \eta\mathcal{P}_a(x)] dx + \gamma\mathcal{R}(\theta). \quad (18)$$

For reconstruction-based methods,  $\mathcal{R}(\theta)$  can be introduced naturally to  $\mathcal{R}(\theta) = \|f_\theta(x) - \mathbb{E}[x|\theta]\|_2^2$ . Here,  $\mathbb{E}[x|\theta] \triangleq \mathbb{E}_{z \sim p(z|\theta)}[g_\phi(z)]$  with  $p(z|\theta)$  is the empirical distribution induced by the encoder with  $z \triangleq h_\psi(x)$ . This setting is justified by its alignment with the conservative estimation principle of the traditional design approach in the training process, that is, the model output is constrained to the typical pattern of the data itself, making it possible to reconstruct every time instance well. Crucially, since the training data are contaminated for  $\eta > 0$ , the empirical distribution  $p(z|\theta)$  and  $\mathbb{E}[x|\theta]$  are influenced by both normal and abnormal instances. To form the corresponding Euler-Lagrange equation, we take the functional derivative  $\frac{\delta \mathcal{L}_{\text{recon}}(f_\theta)}{\delta f_\theta} = 0$  to get the expression:

$$[(1 - \eta)\mathcal{P}_x(x) + \eta\mathcal{P}_a(x)](x - f_\theta(x)) = \gamma(f_\theta(x) - \mathbb{E}[x|\theta]), \quad (19)$$

We solve this elliptic equation under the strong bottleneck condition ( $\gamma \gg \eta\mathcal{P}_a(x)$  and  $\gamma \ll [(1 - \eta)\mathcal{P}_x(x) + \eta\mathcal{P}_a(x)]$ ):

$$f_\theta^*(x) = \frac{[(1 - \eta)\mathcal{P}_x(x) + \eta\mathcal{P}_a(x)]x + \gamma\mathbb{E}[x|\theta]}{(1 - \eta)\mathcal{P}_x(x) + \eta\mathcal{P}_a(x) + \gamma} \quad (20)$$

$$= \mathbb{E}[x|\theta] + \frac{(1 - \eta)\mathcal{P}_x(x) + \eta\mathcal{P}_a(x)}{(1 - \eta)\mathcal{P}_x(x) + \eta\mathcal{P}_a(x) + \gamma}(x - \mathbb{E}[x|\theta]) \quad (21)$$

$$= \mathbb{E}[x|\theta] + \frac{1}{1 + \frac{\gamma}{(1 - \eta)\mathcal{P}_x(x) + \eta\mathcal{P}_a(x)}}(x - \mathbb{E}[x|\theta]) \quad (22)$$

$$\approx \underbrace{\mathbb{E}[x|\theta] + \left(1 - \frac{\gamma}{(1 - \eta)\mathcal{P}_x(x) + \eta\mathcal{P}_a(x)} + \mathcal{O}\left(\frac{\gamma^2}{[(1 - \eta)\mathcal{P}_x(x) + \eta\mathcal{P}_a(x)]^2}\right)\right)}_{\text{Taylor Expansion}}(x - \mathbb{E}[x|\theta]) \quad (23)$$

$$= \mathbb{E}[x|\theta] + \left(1 - \frac{\gamma}{(1 - \eta)\mathcal{P}_x(x) + \eta\mathcal{P}_a(x)}\right)(x - \mathbb{E}[x|\theta]) + \mathcal{O}\left(\frac{\gamma^2}{[(1 - \eta)\mathcal{P}_x(x) + \eta\mathcal{P}_a(x)]^2}\right) \cdot \frac{x - \mathbb{E}[x|\theta]}{\|x - \mathbb{E}[x|\theta]\|_2}. \quad (24)$$

### A.3 Mechanistic Interpretation of Over Generalization

The analytical decomposition from Eq.(20) to Eq.(24) reveals the fundamental mechanisms that govern the reconstruction behavior.

**Theorem 1** When  $\eta > 0$  and  $\gamma > 0$ , the optimal reconstruction function  $f_\theta^*(x)$  satisfies the following expression, which can be acquired from Eq.(24):

$$\|f_\theta^*(x) - x\|_2 \leq \underbrace{\frac{\gamma}{A(x)}\|x - \mathbb{E}[x|\theta]\|_2}_{\text{Anomaly Suppression}} + \underbrace{\mathcal{O}\left(\frac{\gamma^2}{A(x)^2}\right)}_{\text{Unit Vector}} \cdot \underbrace{\zeta}_{\text{Unit Vector}} \quad (25)$$

$$= \frac{\gamma}{A(x)}\|x - \mathbb{E}[x|\theta]\|_2 + \mathcal{O}\left(\frac{\gamma^2}{A(x)^2}\right) \quad (26)$$

where  $A(x) \triangleq (1 - \eta)\mathcal{P}_x(x) + \eta\mathcal{P}_a(x)$  represents the local data density mixture at point  $x$  and  $\zeta \triangleq \frac{x - \mathbb{E}[x|\theta]}{\|x - \mathbb{E}[x|\theta]\|_2}$  is the term for direction correction.

#### A.3.1 Density-Driven Error Scaling

The decomposition of the optimal reconstruction function  $f_\theta^*(x)$  in Eq.(24) and Eq.(25) reveals a critical mechanism that governs over generalization. With the defined *mixed local density*  $A(x)$  and *regularization strength*  $\gamma$ , the primary error term  $\frac{\gamma}{A(x)}$  exhibits an inverse proportionality to  $A(x)$ , leading to the following regimes:

- **High-Density Regions** ( $\gamma \ll A(x)$ ):

$$\frac{\gamma}{A(x)} \rightarrow 0 \implies \|f_\theta^*(x) - x\|_2 \approx \mathcal{O}\left(\frac{\gamma^2}{A(x)^2}\right) \implies f_\theta^*(x) \approx x. \quad (27)$$

Accurate reconstructions dominate as the density of normal instances suppresses abnormal residuals.



- **Low-Density Regions** ( $\gamma \sim A(x)$ ):

$$\frac{\gamma}{A(x)} \approx 1 \implies \|f_\theta^*(x) - x\|_2 \approx \|\mathbb{E}[x|\theta] - x\|_2 + \mathcal{O}\left(\frac{\gamma^2}{A(x)^2}\right) \implies f_\theta^*(x) \approx \mathbb{E}[x|\theta]. \quad (28)$$

The issue of over generalization may emerge as regularization forces reconstructions toward the latent manifold expectation.

### A.3.2 Latent Manifold Attraction

The defined  $\mathbb{E}[x|\theta]$  encapsulates a dual mathematical role within our framework. *Statistically*, it is rigorously defined through the encoder-decoder architecture as  $\mathbb{E}[x|\theta] \triangleq \mathbb{E}_{z \sim p(z|\theta)}[g_\phi(z)]$ , where  $p(z|\theta)$  represents the empirical latent distribution generated by the encoder  $h_\psi(x)$ . *Geometrically*, it also serves as the  $L_2$  optimal projection anchor on the learned manifold  $\mathcal{M}_{\text{target}}$ , which satisfies the following objective:

$$\mathbb{E}[x|\theta] = \arg \min_{\tilde{x} \in \mathcal{M}_{\text{target}}} \mathbb{E}_{x \sim \mathcal{P}_x} \|\tilde{x} - x\|_2^2, \quad (29)$$

where  $\mathcal{M}_{\text{target}} = \{g_\phi(z)\} = \{g_\phi(h_\psi(x))\}$  denotes the manifold induced by the decoder. This dual role establishes  $\mathbb{E}[x|\theta]$  as an attractor, since both the statistical expectation of the decoder output and the geometric centroid minimize projection errors. These properties explain its ability to govern reconstruction behaviors while remaining sensitive to the underlying data density  $\mathcal{P}_x(x)$ , thus providing a unified perspective to analyze the expansion of the manifold under regularization constraints.

The learning process establishes a dynamic equilibrium between reconstruction fidelity and regularization forces, governed by the data density landscape. For normal samples  $x \sim \mathcal{P}_x$ , the model aims to preserve the accurate mapping:

$$f_\theta^*(x) \approx x \implies \|f_\theta(x) - x\|_2^2 \leq \epsilon, \quad (30)$$

which preserves the geometric fidelity of normal instances on the manifold  $\mathcal{M}_{\text{target}}$ . Conversely, for anomalies  $x_a \sim \mathcal{P}_a$ , the regularization term enforces alignment with the latent manifold expectation:

$$f_\theta^*(x_a) \approx \mathbb{E}[x|\theta] \implies \|f_\theta(x_a) - \mathbb{E}[x|\theta]\|_2^2 \leq \epsilon. \quad (31)$$

This competition induces a critical contamination threshold  $\eta_{\text{crit}}$  defined by:

$$\eta_{\text{crit}} = \sup \left\{ \eta \in (0, 1) \mid \mathbb{E}_{x_a} \|x_a - f_\theta(x_a)\|_2^2 > \mathbb{E}_x \|x - f_\theta(x)\|_2^2 \right\}. \quad (32)$$

When  $\eta > \eta_{\text{crit}}$ , the expanded manifold  $\mathcal{M}_{\text{target}}^* = \mathcal{M}_{\text{target}} \cup \{f_\theta(x_a) | x_a \sim \mathcal{P}_a\}$  exhibits dimensional inflation ( $\dim(\mathcal{M}^*) > \dim(\mathcal{M}_{\text{target}})$ ), causing the anomaly-normal separability to collapse.

From this point, inspired by the manifold theorem, we propose IGAD, which can benefit both the balance of robustness and sensitivity and the tightness of the target manifold  $\mathcal{M}_{\text{target}}$  to eliminate potential abnormal instances during training.

## B Proof of the convergence for IGAD

**Theorem 2** Under ideal conditions, IGAD can converge to the target distribution, which consists only of all normal time instances for a given dataset. For simplification, we select  $x$  and  $z$  for  $x^i$  and  $z^i$ , respectively. We define the generated distribution, represented by  $\mathcal{P}_\theta(y)$ , as the PDF of  $y$  when  $y = f_\theta(z)$  and  $z \sim \mathcal{P}_z$ . Here, we only pay attention to the loss items relative, i.e.  $\mathcal{L}_{\text{recon}}$ ,  $\mathcal{L}_{\text{idem}}$  and  $\mathcal{L}_{\text{tight}}$ . The final loss function can be divided into two parts:

$$\mathcal{L}(\theta; \theta') = \underbrace{\lambda_{\text{rec}} \mathcal{L}_{\text{recon}}(\theta) + \lambda_{\text{tight}} \mathcal{L}_{\text{tight}}(\theta; \theta')}_{\mathcal{L}_{\text{rt}}} + \lambda_{\text{idem}} \mathcal{L}_{\text{idem}}(\theta; \theta') \quad (33)$$

We assume a large enough model capacity such that both terms can obtain a global minimum:

$$\theta^* = \arg \min_{\theta} \mathcal{L}_{\text{rt}}(\theta; \theta^*) = \arg \min_{\theta} \mathcal{L}_{\text{idem}}(\theta; \theta^*) \quad (34)$$

Then,  $\exists \theta^* : \mathcal{P}_{\theta^*} = \mathcal{P}_x$  and for  $\lambda_{\text{idem}} = 1$ , this is the only one possible  $\mathcal{P}_{\theta^*}$ .

We first demonstrate the global minimum  $\mathcal{L}_{\text{rt}}$ . After that, we further verify the global minimum for  $\mathcal{L}_{\text{idem}}$ . For a given parameter  $\theta$  in the parameter space  $\Theta$  and an input  $\mathcal{X}$ ,  $\Phi_{\theta \in \Theta}(\mathcal{X})$  is used to calculate the differences between  $f_\theta(\mathcal{X})$  and  $\mathcal{X}$ .

**Step 1: Global minimum of  $\mathcal{L}_{\text{rt}}$  given the current parameters  $\theta^*$ .**

$$\mathcal{L}_{\text{rt}}(\theta; \theta^*) = \mathbb{E}_x [\mathcal{D}(f_\theta(x), x)] - \lambda_{\text{tight}} \mathbb{E}_z [\mathcal{D}(f_\theta(f_{\theta^*}(z)), f_{\theta^*}(z))] \quad (35)$$

$$= \int \Phi_\theta(x) \mathcal{P}_x(x) dx - \lambda_{\text{tight}} \int \Phi_\theta(f_{\theta^*}(z)) \mathcal{P}_{\theta^*}(z) dz \quad (36)$$

Change variables: let  $y := x$  for the left integral and  $y := f_{\theta^*}(z)$  (a well-learned model should ensure that  $x$  and  $f_{\theta^*}(z)$  lie on the same  $\mathcal{M}_{\text{target}}$ ) for the right integral. Then Eq.(36) can be transformed into the following formular:

$$\mathcal{L}_{\text{rt}}(\theta; \theta^*) = \int \Phi_\theta(y) \mathcal{P}_x(y) dy - \lambda_{\text{tight}} \int \Phi_\theta(y) \mathcal{P}_{\theta^*}(y) dy \quad (37)$$

$$= \int \Phi_\theta(y) \underbrace{(\mathcal{P}_x(y) - \lambda_{\text{tight}} \mathcal{P}_{\theta^*}(y))}_{\text{Regularization for Tightening the Manifold}} dy \quad (38)$$

Let  $\mathbb{M} = \sup_{y_1, y_2} \mathcal{D}(y_1, y_2)$ , where the supremum is taken over all possible pairs  $y_1, y_2$ . Since  $\Phi_\theta$  is non-negative, the global minimum is achieved when:

$$\Phi_{\theta^*}(y) = \mathbb{M} \cdot [\mathbf{1}_{\{\mathcal{P}_x(y) < \lambda_{\text{tight}} \mathcal{P}_{\theta^*}(y)\}}], \quad \forall y \quad (39)$$

**Step 2: Global minimum of  $\mathcal{L}_{\text{idem}}$ .**

$$\mathcal{L}_{\text{idem}}(\theta, \theta^*) = \mathbb{E}_z [\mathcal{D}(f_{\theta^*}(f_\theta(z)), f_\theta(z))] \quad (40)$$

$$= \mathbb{E}_z [\Phi_{\theta^*}(f_\theta(z))] \quad (41)$$

Substituting  $\Phi_{\theta^*}$  from Eq.(39) and exchange the position of  $\theta$  and  $\theta^*$  because we check the minimum of the inner  $f$  for  $\mathcal{L}_{\text{idem}}$ , instead of the outer  $f$  in  $\mathcal{L}_{\text{tight}}$ :

$$\mathcal{L}_{\text{idem}}(\theta; \theta^*) = \mathbb{M} \cdot \mathbb{E}_z [\mathbf{1}_{\{\mathcal{P}_x(y) < \lambda_{\text{idem}} \mathcal{P}_\theta(y)\}}] \quad (42)$$

Taking  $\arg \min_{\theta}$  of Eq.(42):

$$\theta^* = \mathbb{M} \cdot \arg \min_{\theta} \mathbb{E}_z [\mathbf{1}_{\{\mathcal{P}_x(y) < \lambda_{\text{idem}} \mathcal{P}_\theta(y)\}}] \quad (43)$$

Given these operations, if  $\mathcal{P}_{\theta^*} = \mathcal{P}_x$  and  $\lambda_{\text{idem}} \leq 1$ , the loss value is 0. Specifically, for  $\lambda_{\text{idem}} = 1$ ,  $\theta^* : \mathcal{P}_{\theta^*} = \mathcal{P}_x$  is the only minimizer because the total sum of the probability must be 1. In addition, any deviation where  $\mathcal{P}_\theta(y) < \mathcal{P}_x(y)$  implies  $\exists y$  with  $\mathcal{P}_\theta(y) > \mathcal{P}_x(y)$ , increasing the loss.

## C Explanations for Basic Models

In our experiments, we select 15 basic reconstruction-based models with different structures to evaluate IGAD more comprehensively. We consider the selective strategy of these basic models from two perspectives. First, we select well-designed models specifically tailored for multivariate time series anomaly detection. In addition, we also take time series foundation models into consideration, which can be competitive candidates in various time series tasks, including reconstruction-based MTS AD. Here, we provide more detailed descriptions of the selected models for a better understanding of their structures.

### C.1 Models Designed for MTS AD

We include the following models designed for MTS AD in our experiments: CATCH [60], M2N2 [26], SARAD [10], Anomaly Transformer [62], FGANomaly [13], CAE-M [71], MTAD-GAT [72], MSCRED [70], OnimAnomaly [50] and DAGMM [75].

- CATCH [60]: CATCH framework introduces two key innovations for multivariate time series anomaly detection: (1) A frequency patching mechanism that partitions the frequency domain into fine-grained bands to better capture diverse subsequence anomalies, addressing the limitations of coarse-grained frequency analysis in existing methods; (2) A novel Channel Fusion Module with a dynamic correlation discovery mechanism that employs a bi-level optimization strategy to adaptively learn context-aware channel interactions, clustering relevant channels while mitigating noise from irrelevant ones through masked attention, effectively bridging the gap between channel-independent and channel-dependent approaches. The framework further enhances detection robustness through a dual-domain reconstruction objective based on time and frequency, and a novel point-aligned scoring mechanism that synergizes temporal and spectral anomalies, enabling superior performance in detecting both point and heterogeneous subsequence anomalies across varied real-world and synthetic scenarios.
- M2N2 [26]: M2N2 is a novel test-time adaptation framework for unsupervised time series anomaly detection to address the *new normal problem* caused by distribution shifts between training and test data. First, a trend estimation module using exponential moving averages to dynamically detrend input sequences, enabling adaptation to evolving data patterns while preserving underlying dynamics. Then, a self-supervised model update strategy that selectively updates parameters during inference using predicted normal instances, effectively learning new normal patterns while mitigating contamination from anomalies. The approach bridges test-time adaptation with time series anomaly detection through its dual mechanism of trend-aware normalization and confidence-based parameter adjustment, requiring neither access to training data nor additional supervision. By combining real-time trend adaptation with model fine-tuning on detrended sequences, the method demonstrates superior robustness to distribution shifts across diverse real-world benchmarks while maintaining computational efficiency suitable for streaming applications.
- SARAD [10]: SARAD is a novel approach for time series anomaly detection that integrates Spatial Association Reduction with data reconstruction via Transformer-based models. Its innovation lies in capturing both temporal and spatial dependencies within multivariate time series data, a challenge that previous methods addressed largely only from a temporal perspective. The key feature of SARAD is its dual focus on data reconstruction errors and progression reconstruction errors, where the latter focuses on spatial changes in anomaly propagation. SARAD leverages Multi-Head Self-Attention from Transformer layers to capture spatial relationships between features over time, and uses this information in conjunction with progression-based metrics to robustly detect anomalies. Unlike traditional models that may struggle with short-range anomalies or overlook spatially distributed anomalies, SARAD effectively identifies anomalies by observing how spatial associations evolve, even when the underlying data distribution is shifted.
- Anomaly Transformer [62]: Anomaly Transformer introduces a novel approach to time-series anomaly detection by leveraging a Transformer-based model and focusing on the concept of association discrepancy. This model incorporates a dual-branch mechanism within the Anomaly-Attention module, which enhances its ability to distinguish between nor-

mal and abnormal data points. The key innovation lies in the use of Association Discrepancy, measured through symmetrized Kullback–Leibler divergence, between the learned series association and a prior association. By employing a minimax strategy during optimization, the model minimizes the prior-association in the early phase while maximizing the association discrepancy in the later phase, ensuring a more robust distinction between normal and abnormal time points. This method improves the detection performance by forcing the model to focus more on non-adjacent time series data, thus enhancing its sensitivity to anomalies. The final anomaly score is a combination of reconstruction loss and association discrepancy, ensuring that both components contribute to detection, offering a more accurate and interpretable framework for time-series anomaly detection.

- FGANomaly [13]: The proposed model introduces a novel approach to anomaly detection by leveraging Generative Adversarial Networks in the context of multivariate time series data, with a particular focus on handling polluted or noisy training sets. The core innovation lies in the use of a GAN framework, where the generator learns to reconstruct normal time series, while the discriminator distinguishes between real and reconstructed data. Unlike traditional methods that may struggle with noisy or incomplete training data, this model introduces a specific mechanism to adapt the GAN training process to be robust to polluted data. It utilizes a data preprocessing strategy that filters out or reduces the impact of noisy segments, ensuring the model learns meaningful patterns from the time series. This unique approach enables the model to efficiently detect anomalies by leveraging the powerful generative capabilities of GANs while simultaneously addressing the challenges posed by noisy real-world time series data.
- CAE-M [71]: CAE-M addresses several challenges in multivariate time-series anomaly detection, particularly in the presence of noisy data. This proposed approach integrates a convolutional autoencoder for feature extraction, which captures spatial dependencies in multi-sensor time-series signals, with a memory network that combines both non-linear and linear prediction methods to capture temporal dependencies. The key innovation of CAE-M lies in the joint optimization of these components using a compound objective function, which simultaneously minimizes reconstruction error, prediction error, and a regularization term based on Maximum Mean Discrepancy (MMD). The MMD penalty is particularly crucial as it mitigates the influence of noisy data by encouraging the learned feature distribution to approximate that of a Gaussian distribution, thus reducing over-fitting. This architecture allows the model to effectively differentiate between normal and anomalous data even when the training set is polluted with noise.
- MTAD-GAT [72]: MTAD-GAT introduces a novel framework for anomaly detection in multivariate time series data by explicitly capturing the correlations between different features and timestamps. The unique structure of this model leverages two parallel Graph Attention Network (GAT) layers: one feature-oriented and one time-oriented. The feature-oriented GAT layer models the causal relationships between different time-series features, while the time-oriented GAT layer captures temporal dependencies within each time-series. This dual attention mechanism allows the model to dynamically learn both feature-wise and temporal dependencies. Furthermore, MTAD-GAT integrates both forecasting-based and reconstruction-based models, optimizing them through a joint objective function to enhance the representation of time-series data. The forecasting model focuses on single-timestamp predictions, while the reconstruction model learns a latent representation of the entire time-series, making the model robust against various anomaly types.
- MSCRED [70]: MSCRED introduces an effective approach for unsupervised anomaly detection and diagnosis in multivariate time series. The core innovation lies in its ability to jointly tackle three key tasks: anomaly detection, root cause identification, and anomaly severity interpretation. MSCRED achieves this by constructing multi-scale system signature matrices that represent the inter-correlations between time series at different temporal resolutions. These signature matrices are then processed through a fully convolutional encoder to capture spatial dependencies, while an attention-based Convolutional Long Short-Term Memory Network models the temporal dependencies across time steps. The decoder reconstructs these matrices, and the residuals are used to identify anomalies. This architecture is enhanced by its attention mechanism, which adaptively focuses on the most relevant historical time steps to improve anomaly detection.

- OnimAnomaly [50]: The proposed model introduces an innovative approach to anomaly detection by incorporating a Stochastic Recurrent Neural Network (SRNN) to model the temporal dependencies and capture the inherent uncertainty within multivariate time-series data. The key innovation of this model is the introduction of stochasticity in the recurrent network, where the model learns a distribution over the hidden states instead of a deterministic hidden representation. This probabilistic approach allows the SRNN to better handle incomplete data by explicitly modeling the uncertainty in the data generation process. The network is structured to combine both temporal and spatial dependencies by employing a combination of recurrent layers with stochastic units and a mixture of Gaussian distributions to represent uncertainty. Furthermore, the model includes a robust loss function that incorporates both reconstruction error and a regularization term based on the variance of the learned hidden states.
- DAGMM [75]: DAGMM introduces an architecture for unsupervised anomaly detection that combines the strengths of dimensionality reduction via a deep autoencoder with density estimation through a Gaussian Mixture Model (GMM). The key point of this approach is the joint optimization, where both the dimensionality reduction and the density estimation components are optimized simultaneously in an end-to-end manner, eliminating the need for pre-training and decoupled training. This architecture includes two main components: a compression network that reduces the dimensionality of input data and encodes it alongside the reconstruction error, and an estimation network that evaluates the likelihood of each data point within the GMM framework. This joint training, facilitated by the estimation network’s regularization, allows the autoencoder to avoid suboptimal local minima and better capture the essential features of the data for anomaly detection.

## C.2 Time Series Foundation Model

Time series foundation models have shown their powerful potential for downstream time series tasks, including forecasting, imputation, classification, and also reconstruction-based anomaly detection. We select FITS [64], Peri-midFormer [59], ModernTCN [34], OFA [74], and TimesNet [58] in our experiments.

- FITS [64]: FITS introduces an innovative approach to time series analysis by operating within the complex frequency domain. It utilizes complex-valued linear interpolation to capture both amplitude and phase information, enabling the model to effectively learn amplitude scaling and phase shifting. This ability allows FITS to achieve state-of-the-art performance in tasks such as forecasting and anomaly detection. Despite its advanced capabilities, FITS maintains a remarkably compact architecture consisting of approximately 10,000 parameters, making it highly efficient. This compactness ensures that FITS is particularly well-suited for deployment on edge devices with limited computational resources, offering an excellent balance of performance and efficiency. By leveraging these innovative techniques, FITS demonstrates that high accuracy can be achieved in time series analysis without the need for large, resource-intensive models.
- Peri-midFormer [59]: Peri-midFormer presents an innovative transformer-based architecture that decomposes time series data into a periodic pyramid structure. This decomposition captures multi-periodic variations by representing the time series at multiple levels, each corresponding to different periodic components. The model employs self-attention mechanisms to effectively capture complex temporal relationships across these levels, enhancing its performance in tasks such as forecasting, imputation, classification, and anomaly detection.
- ModernTCN [34]: ModernTCN revitalizes convolutional approaches in time series analysis by introducing a pure convolutional structure that efficiently captures both cross-time and cross-variable dependencies. By incorporating large convolutional kernels and multiple convolutional layers, ModernTCN achieves substantial effective receptive fields, enabling it to model complex temporal patterns effectively. This design results in state-of-the-art performance across various time series tasks, including forecasting, imputation, classification, and anomaly detection.
- OFA [74]: One Fits All leverages pre-trained language models (LMs) to enhance time series analysis across multiple tasks. By fine-tuning these LMs on time series data, the model adapts the rich, generalized representations learned from large-scale textual data to the

specific characteristics of time series data. This approach demonstrates that pre-trained models from natural language or image domains can achieve comparable or even superior performance in time series tasks such as classification, forecasting, and anomaly detection, highlighting the versatility and power of pre-trained LMs in this context.

- TimesNet [58]: TimesNet introduces a task-general backbone for time series analysis by transforming 1D time series data into 2D tensors based on multiple periods. This transformation allows the model to capture both intraperiod and interperiod variations effectively. Utilizing a parameter-efficient inception block, TimesNet discovers multi-periodicity adaptively and extracts complex temporal variations from the transformed 2D tensors. This design enables TimesNet to achieve consistent state-of-the-art performance across five common time series analysis tasks, including short- and long-term forecasting, imputation, classification, and anomaly detection.

## D Hyperparameter Setting

There are five crucial hyperparameters during our experiments, including  $\lambda_{\text{rec}}$ ,  $\lambda_{\text{idem}}$ ,  $\lambda_{\text{tight}}$ ,  $\lambda_{\text{aux}}$  and  $\alpha$ . **In the latest study conducted by Liu and Paparrizos [32], the pipeline has made sufficient explorations for the optimal  $\lambda_{\text{rec}}$  and  $\lambda_{\text{aux}}$ , and these two hyperparameters are fixed when performing experiments.** Meanwhile, we also select certain reconstruction-based models that have not been temporarily imported into this pipeline. **For these models, we use the hyperparameters suggested in their original papers or repositories for  $\lambda_{\text{rec}}$  and  $\lambda_{\text{aux}}$ .** For the hyperparameters introduced by IGAD, we perform a detailed grid search for  $\lambda_{\text{idem}}$ ,  $\lambda_{\text{tight}}$ , and  $\alpha$ . The search intervals for each hyperparameter can be shown as:

- $\lambda_{\text{idem}}$ : [0.1, 0.2, 0.3, 0.4, 0.5, 0.6, 0.7, 0.8, 0.9, 1.0],
- $\lambda_{\text{tight}}$ : [0.1, 0.2, 0.3, 0.4, 0.5, 0.6, 0.7, 0.8, 0.9, 1.0],
- $\alpha$ : [1.1, 1.2, 1.3, 1.4, 1.5].

Then, we summarize the optimal hyperparameters for each model and each dataset in Tab.5.

Table 5: Optimal hyperparameters after grid search in our experiments.

| Model          | Venue         | Dataset                 |                          |          |                         |                          |          |                         |                          |          |                         |                          |          |
|----------------|---------------|-------------------------|--------------------------|----------|-------------------------|--------------------------|----------|-------------------------|--------------------------|----------|-------------------------|--------------------------|----------|
|                |               | SMD                     |                          |          | MSL                     |                          |          | PSM                     |                          |          | SMAP                    |                          |          |
|                |               | $\lambda_{\text{idem}}$ | $\lambda_{\text{tight}}$ | $\alpha$ |
| CATCH          | ICLR, 2025    | 0.5                     | 0.9                      | 1.1      | 0.1                     | 0.2                      | 1.5      | 0.3                     | 0.5                      | 1.4      | 1.0                     | 0.5                      | 1.5      |
| M2N2           | AAAI, 2024    | 0.5                     | 0.4                      | 1.2      | 0.1                     | 0.5                      | 1.4      | 0.1                     | 0.3                      | 1.5      | 0.1                     | 1.0                      | 1.3      |
| FITS           | ICLR, 2024    | 0.5                     | 0.1                      | 1.1      | 1.0                     | 1.0                      | 1.5      | 0.3                     | 1.0                      | 1.2      | 0.2                     | 0.3                      | 1.5      |
| ModernTCN      | ICLR, 2024    | 0.1                     | 1.0                      | 1.4      | 0.1                     | 0.8                      | 1.3      | 0.1                     | 0.1                      | 1.1      | 0.1                     | 0.1                      | 1.1      |
| Peri-midFormer | NeurIPS, 2024 | 0.1                     | 1.0                      | 1.5      | 0.5                     | 0.4                      | 1.4      | 0.8                     | 0.9                      | 1.4      | 0.1                     | 0.1                      | 1.3      |
| SARAD          | NeurIPS, 2024 | 0.1                     | 0.1                      | 1.1      | 0.1                     | 0.9                      | 1.5      | 0.4                     | 0.2                      | 1.5      | 0.1                     | 0.1                      | 1.1      |
| TimesNet       | ICLR, 2023    | 0.1                     | 1.0                      | 1.4      | 0.8                     | 0.1                      | 1.3      | 0.1                     | 1.0                      | 1.2      | 1.0                     | 1.0                      | 1.3      |
| OFA            | NeurIPS, 2023 | 0.1                     | 1.0                      | 1.5      | 0.8                     | 0.9                      | 1.3      | 0.5                     | 0.4                      | 1.3      | 0.3                     | 0.1                      | 1.3      |
| A.T.           | ICLR, 2022    | 0.9                     | 1.0                      | 1.4      | 1.0                     | 0.2                      | 1.1      | 0.8                     | 0.7                      | 1.4      | 0.7                     | 0.8                      | 1.3      |
| FGANomaly      | TKDE, 2021    | 0.2                     | 0.1                      | 1.4      | 0.1                     | 0.1                      | 1.1      | 0.1                     | 0.4                      | 1.3      | 0.1                     | 1.0                      | 1.5      |
| CAE-M          | TKDE, 2021    | 0.1                     | 0.1                      | 1.5      | 0.8                     | 0.1                      | 1.5      | 0.2                     | 1.0                      | 1.1      | 0.1                     | 0.1                      | 1.5      |
| MTAD-GAT       | ICDM, 2021    | 0.8                     | 0.8                      | 1.1      | 0.2                     | 0.3                      | 1.3      | 0.1                     | 0.6                      | 1.4      | 0.9                     | 1.0                      | 1.4      |
| OmniAnomaly    | KDD, 2019     | 0.2                     | 0.3                      | 1.5      | 0.1                     | 0.8                      | 1.3      | 0.9                     | 0.7                      | 1.5      | 0.2                     | 0.5                      | 1.5      |
| MSCRED         | AAAI, 2019    | 0.1                     | 0.5                      | 1.4      | 0.4                     | 0.4                      | 1.5      | 0.1                     | 0.1                      | 1.1      | 0.3                     | 0.9                      | 1.5      |
| DAGMM          | ICLR, 2018    | 0.2                     | 1.0                      | 1.1      | 0.8                     | 0.4                      | 1.4      | 0.2                     | 0.1                      | 1.1      | 0.1                     | 0.9                      | 1.5      |

## E More Detailed Experimental Results

### E.1 Distinguishable Distributions of Anomaly Scores and Auxiliary Metrics

In this section, we will provide more experimental results for other detailed information. First, we show more cases where the application of IGAD effectively generates more distinguishable distributions of anomaly scores for normal and abnormal instances, shown as Fig.7(a) and Fig.7(b). Second, we list other evaluation metrics for classification tasks such as AUC-PR, AUC-ROC, VUS-ROC and different types of F1 from Tab.6 to Tab.13, which can still serve as auxiliary metrics although they exist potential evaluation shortcomings in the field of multivariate time series anomaly detection [32]. Improvements in these metrics can also be observed.

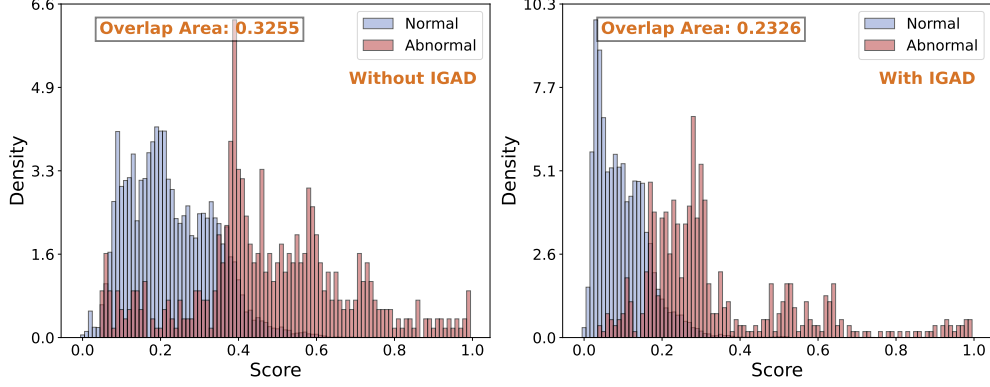

(a) Anomaly scores for MSCRED on dataset SMD.

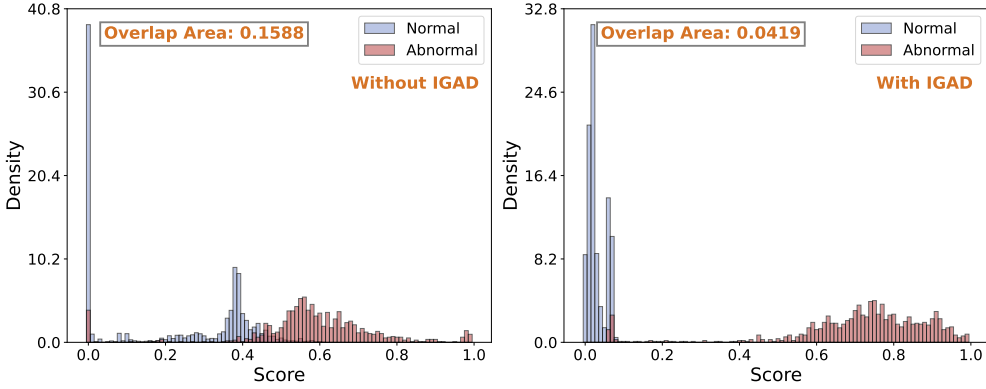

(b) Anomaly scores for FGANomaly on dataset SMAP.

Figure 7: Anomaly score distributions for different models and datasets.



Table 6: More results on dataset SMD with IGAD.

| Model          | AUC-PR              | AUC-ROC             | VUS-ROC             | Standard-F1         |
|----------------|---------------------|---------------------|---------------------|---------------------|
| CATCH          | 0.2341 $\pm$ 0.0038 | 0.8952 $\pm$ 0.0019 | 0.8343 $\pm$ 0.0031 | 0.1831 $\pm$ 0.0041 |
| M2N2           | 0.0407 $\pm$ 0.0080 | 0.6401 $\pm$ 0.0772 | 0.5537 $\pm$ 0.0630 | 0.0335 $\pm$ 0.0308 |
| FITS           | 0.0564 $\pm$ 0.0023 | 0.7490 $\pm$ 0.0122 | 0.7300 $\pm$ 0.0175 | 0.0470 $\pm$ 0.0200 |
| ModernTCN      | 0.2486 $\pm$ 0.0011 | 0.8966 $\pm$ 0.0002 | 0.8383 $\pm$ 0.0004 | 0.3063 $\pm$ 0.0022 |
| Peri-midFormer | 0.2026 $\pm$ 0.0071 | 0.8797 $\pm$ 0.0037 | 0.8209 $\pm$ 0.0026 | 0.1694 $\pm$ 0.0055 |
| SARAD          | 0.2748 $\pm$ 0.0096 | 0.9092 $\pm$ 0.0054 | 0.8259 $\pm$ 0.0089 | 0.3155 $\pm$ 0.0120 |
| TimesNet       | 0.0861 $\pm$ 0.0347 | 0.7553 $\pm$ 0.0272 | 0.7156 $\pm$ 0.0298 | 0.1303 $\pm$ 0.0628 |
| OFA            | 0.1433 $\pm$ 0.0254 | 0.6935 $\pm$ 0.0121 | 0.6639 $\pm$ 0.0101 | 0.2220 $\pm$ 0.0353 |
| A.T.           | 0.0679 $\pm$ 0.0914 | 0.5137 $\pm$ 0.0763 | 0.4960 $\pm$ 0.0536 | 0.0661 $\pm$ 0.1288 |
| FGANomaly      | 0.4929 $\pm$ 0.0116 | 0.9324 $\pm$ 0.0023 | 0.8705 $\pm$ 0.0065 | 0.4943 $\pm$ 0.0308 |
| CAE-M          | 0.1687 $\pm$ 0.1294 | 0.6635 $\pm$ 0.1191 | 0.5314 $\pm$ 0.1537 | 0.1326 $\pm$ 0.1118 |
| MTAD-GAT       | 0.4562 $\pm$ 0.0379 | 0.8911 $\pm$ 0.0239 | 0.8886 $\pm$ 0.0227 | 0.5304 $\pm$ 0.0193 |
| OmniAnomaly    | 0.2621 $\pm$ 0.0026 | 0.9052 $\pm$ 0.0031 | 0.8274 $\pm$ 0.0024 | 0.2830 $\pm$ 0.0029 |
| MSCRED         | 0.4377 $\pm$ 0.0217 | 0.9216 $\pm$ 0.0331 | 0.8567 $\pm$ 0.0329 | 0.3939 $\pm$ 0.0093 |
| DAGMM          | 0.2285 $\pm$ 0.0684 | 0.6875 $\pm$ 0.0275 | 0.4962 $\pm$ 0.0401 | 0.1449 $\pm$ 0.1425 |

  

| Model          | PA-F1               | Event-based-F1      | R-based-F1          | Affiliation-F1      |
|----------------|---------------------|---------------------|---------------------|---------------------|
| CATCH          | 0.4055 $\pm$ 0.1009 | 0.2638 $\pm$ 0.0186 | 0.0056 $\pm$ 0.0000 | 0.6418 $\pm$ 0.0039 |
| M2N2           | 0.2570 $\pm$ 0.2359 | 0.0666 $\pm$ 0.0626 | 0.0027 $\pm$ 0.0024 | 0.4552 $\pm$ 0.1265 |
| FITS           | 0.5331 $\pm$ 0.0347 | 0.0938 $\pm$ 0.0333 | 0.0046 $\pm$ 0.0000 | 0.7750 $\pm$ 0.0177 |
| ModernTCN      | 0.4886 $\pm$ 0.0004 | 0.3846 $\pm$ 0.0015 | 0.0056 $\pm$ 0.0000 | 0.6524 $\pm$ 0.0001 |
| Peri-midFormer | 0.4670 $\pm$ 0.1321 | 0.2529 $\pm$ 0.0294 | 0.0056 $\pm$ 0.0000 | 0.6198 $\pm$ 0.0720 |
| SARAD          | 0.4912 $\pm$ 0.0114 | 0.3920 $\pm$ 0.0141 | 0.0056 $\pm$ 0.0000 | 0.7231 $\pm$ 0.0034 |
| TimesNet       | 0.6006 $\pm$ 0.0614 | 0.2222 $\pm$ 0.0866 | 0.0047 $\pm$ 0.0000 | 0.8155 $\pm$ 0.0287 |
| OFA            | 0.7442 $\pm$ 0.0211 | 0.3747 $\pm$ 0.0296 | 0.0050 $\pm$ 0.0002 | 0.8561 $\pm$ 0.0285 |
| A.T.           | 0.3166 $\pm$ 0.4273 | 0.2140 $\pm$ 0.3299 | 0.0033 $\pm$ 0.0031 | 0.5968 $\pm$ 0.3153 |
| FGANomaly      | 0.6531 $\pm$ 0.0362 | 0.6095 $\pm$ 0.0258 | 0.0056 $\pm$ 0.0000 | 0.7839 $\pm$ 0.0392 |
| CAE-M          | 0.3069 $\pm$ 0.1643 | 0.2520 $\pm$ 0.1600 | 0.0313 $\pm$ 0.0146 | 0.2563 $\pm$ 0.1742 |
| MTAD-GAT       | 0.8913 $\pm$ 0.0249 | 0.7379 $\pm$ 0.0282 | 0.0047 $\pm$ 0.0003 | 0.9257 $\pm$ 0.0210 |
| OmniAnomaly    | 0.5340 $\pm$ 0.0336 | 0.3775 $\pm$ 0.0115 | 0.0056 $\pm$ 0.0000 | 0.7751 $\pm$ 0.0282 |
| MSCRED         | 0.6960 $\pm$ 0.0402 | 0.6109 $\pm$ 0.0312 | 0.0056 $\pm$ 0.0001 | 0.7587 $\pm$ 0.0329 |
| DAGMM          | 0.3319 $\pm$ 0.2084 | 0.3286 $\pm$ 0.1672 | 0.0106 $\pm$ 0.0067 | 0.3648 $\pm$ 0.1950 |

Table 7: More results on dataset SMD without IGAD.

| Model          | AUC-PR              | AUC-ROC             | VUS-ROC             | Standard-F1         |
|----------------|---------------------|---------------------|---------------------|---------------------|
| CATCH          | 0.2272 $\pm$ 0.0053 | 0.8891 $\pm$ 0.0014 | 0.8222 $\pm$ 0.0019 | 0.1811 $\pm$ 0.0031 |
| M2N2           | 0.0234 $\pm$ 0.0003 | 0.4342 $\pm$ 0.0034 | 0.3623 $\pm$ 0.0068 | 0.0487 $\pm$ 0.0000 |
| FITS           | 0.0419 $\pm$ 0.0025 | 0.6946 $\pm$ 0.0192 | 0.6769 $\pm$ 0.0220 | 0.0356 $\pm$ 0.0076 |
| ModernTCN      | 0.1930 $\pm$ 0.0022 | 0.8792 $\pm$ 0.0012 | 0.8188 $\pm$ 0.0020 | 0.1676 $\pm$ 0.0020 |
| Peri-midFormer | 0.2004 $\pm$ 0.0063 | 0.8782 $\pm$ 0.0036 | 0.8198 $\pm$ 0.0028 | 0.1680 $\pm$ 0.0042 |
| SARAD          | 0.2766 $\pm$ 0.0128 | 0.9103 $\pm$ 0.0069 | 0.8264 $\pm$ 0.0113 | 0.3134 $\pm$ 0.0104 |
| TimesNet       | 0.0824 $\pm$ 0.0188 | 0.7583 $\pm$ 0.0170 | 0.7147 $\pm$ 0.0216 | 0.1294 $\pm$ 0.0373 |
| OFA            | 0.0630 $\pm$ 0.0030 | 0.6887 $\pm$ 0.0068 | 0.6778 $\pm$ 0.0072 | 0.1178 $\pm$ 0.0112 |
| A.T.           | 0.0266 $\pm$ 0.0053 | 0.5213 $\pm$ 0.0293 | 0.5175 $\pm$ 0.0240 | 0.0037 $\pm$ 0.0082 |
| FGANomaly      | 0.4943 $\pm$ 0.0063 | 0.9320 $\pm$ 0.0071 | 0.8790 $\pm$ 0.0143 | 0.4663 $\pm$ 0.0094 |
| CAE-M          | 0.1746 $\pm$ 0.1266 | 0.6676 $\pm$ 0.1213 | 0.5360 $\pm$ 0.1568 | 0.1268 $\pm$ 0.1049 |
| MTAD-GAT       | 0.3949 $\pm$ 0.0031 | 0.8710 $\pm$ 0.0043 | 0.8700 $\pm$ 0.0043 | 0.5150 $\pm$ 0.0048 |
| OmniAnomaly    | 0.2578 $\pm$ 0.0011 | 0.9003 $\pm$ 0.0025 | 0.8231 $\pm$ 0.0020 | 0.2798 $\pm$ 0.0017 |
| MSCRED         | 0.4373 $\pm$ 0.0293 | 0.9228 $\pm$ 0.0326 | 0.8517 $\pm$ 0.0271 | 0.3878 $\pm$ 0.0340 |
| DAGMM          | 0.0983 $\pm$ 0.0067 | 0.5554 $\pm$ 0.0136 | 0.4055 $\pm$ 0.0109 | 0.1041 $\pm$ 0.0080 |

  

| Model          | PA-F1               | Event-based-F1      | R-based-F1          | Affiliation-F1      |
|----------------|---------------------|---------------------|---------------------|---------------------|
| CATCH          | 0.3289 $\pm$ 0.0441 | 0.2380 $\pm$ 0.0248 | 0.0056 $\pm$ 0.0000 | 0.6416 $\pm$ 0.0018 |
| M2N2           | 0.3832 $\pm$ 0.0000 | 0.0851 $\pm$ 0.0000 | 0.0044 $\pm$ 0.0000 | 0.5238 $\pm$ 0.0038 |
| FITS           | 0.4901 $\pm$ 0.0580 | 0.0768 $\pm$ 0.0153 | 0.0046 $\pm$ 0.0000 | 0.7382 $\pm$ 0.0113 |
| ModernTCN      | 0.3416 $\pm$ 0.0231 | 0.2309 $\pm$ 0.0115 | 0.0056 $\pm$ 0.0000 | 0.6316 $\pm$ 0.0002 |
| Peri-midFormer | 0.5292 $\pm$ 0.0042 | 0.2522 $\pm$ 0.0027 | 0.0056 $\pm$ 0.0000 | 0.6411 $\pm$ 0.0023 |
| SARAD          | 0.4905 $\pm$ 0.0130 | 0.3904 $\pm$ 0.0142 | 0.0056 $\pm$ 0.0000 | 0.7315 $\pm$ 0.0249 |
| TimesNet       | 0.6230 $\pm$ 0.0434 | 0.2284 $\pm$ 0.0559 | 0.0047 $\pm$ 0.0000 | 0.8128 $\pm$ 0.0259 |
| OFA            | 0.6813 $\pm$ 0.0316 | 0.2243 $\pm$ 0.0241 | 0.0045 $\pm$ 0.0000 | 0.8178 $\pm$ 0.0129 |
| A.T.           | 0.1257 $\pm$ 0.2811 | 0.0182 $\pm$ 0.0407 | 0.0009 $\pm$ 0.0020 | 0.3300 $\pm$ 0.2620 |
| FGANomaly      | 0.5990 $\pm$ 0.0089 | 0.5588 $\pm$ 0.0201 | 0.0056 $\pm$ 0.0000 | 0.7236 $\pm$ 0.0351 |
| CAE-M          | 0.3072 $\pm$ 0.1654 | 0.2522 $\pm$ 0.1607 | 0.0311 $\pm$ 0.0147 | 0.2562 $\pm$ 0.1743 |
| MTAD-GAT       | 0.8556 $\pm$ 0.0044 | 0.7075 $\pm$ 0.0070 | 0.0046 $\pm$ 0.0000 | 0.9264 $\pm$ 0.0007 |
| OmniAnomaly    | 1.0000 $\pm$ 0.0000 | 1.0000 $\pm$ 0.0000 | 0.3893 $\pm$ 0.0526 | 0.9961 $\pm$ 0.0011 |
| MSCRED         | 0.6846 $\pm$ 0.0686 | 0.5927 $\pm$ 0.0695 | 0.0056 $\pm$ 0.0000 | 0.7394 $\pm$ 0.0799 |
| DAGMM          | 0.2317 $\pm$ 0.0012 | 0.1778 $\pm$ 0.0014 | 0.0406 $\pm$ 0.0008 | 0.1789 $\pm$ 0.0003 |

Table 8: More results on dataset MSL with IGAD.

| Model          | AUC-PR              | AUC-ROC             | VUS-ROC             | Standard-F1         |
|----------------|---------------------|---------------------|---------------------|---------------------|
| CATCH          | 0.0286 $\pm$ 0.0007 | 0.7808 $\pm$ 0.0045 | 0.7808 $\pm$ 0.0045 | 0.0000 $\pm$ 0.0000 |
| M2N2           | 0.8250 $\pm$ 0.2050 | 0.9984 $\pm$ 0.0030 | 0.9984 $\pm$ 0.0030 | 0.0000 $\pm$ 0.0000 |
| FITS           | 0.0103 $\pm$ 0.0038 | 0.5104 $\pm$ 0.0508 | 0.5105 $\pm$ 0.0508 | 0.0000 $\pm$ 0.0000 |
| ModernTCN      | 0.0634 $\pm$ 0.0424 | 0.8082 $\pm$ 0.0182 | 0.8085 $\pm$ 0.0181 | 0.0718 $\pm$ 0.0306 |
| Peri-midFormer | 0.0346 $\pm$ 0.0015 | 0.8160 $\pm$ 0.0252 | 0.8160 $\pm$ 0.0252 | 0.0168 $\pm$ 0.0233 |
| SARAD          | 0.0552 $\pm$ 0.0635 | 0.6906 $\pm$ 0.0499 | 0.6908 $\pm$ 0.0497 | 0.0785 $\pm$ 0.1079 |
| TimesNet       | 0.0074 $\pm$ 0.0030 | 0.4316 $\pm$ 0.0824 | 0.4316 $\pm$ 0.0826 | 0.0000 $\pm$ 0.0000 |
| OFA            | 0.0114 $\pm$ 0.0112 | 0.5077 $\pm$ 0.0696 | 0.5077 $\pm$ 0.0696 | 0.0200 $\pm$ 0.0447 |
| A.T.           | 0.0063 $\pm$ 0.0007 | 0.5069 $\pm$ 0.0154 | 0.5068 $\pm$ 0.0152 | 0.0000 $\pm$ 0.0000 |
| FGANomaly      | 0.0525 $\pm$ 0.0103 | 0.8315 $\pm$ 0.0532 | 0.8314 $\pm$ 0.0531 | 0.0986 $\pm$ 0.0577 |
| CAE-M          | 0.0041 $\pm$ 0.0001 | 0.2066 $\pm$ 0.0074 | 0.2067 $\pm$ 0.0072 | 0.0000 $\pm$ 0.0000 |
| MTAD-GAT       | 0.3401 $\pm$ 0.1288 | 0.7066 $\pm$ 0.0655 | 0.7063 $\pm$ 0.0656 | 0.3037 $\pm$ 0.0928 |
| OmniAnomaly    | 0.0088 $\pm$ 0.0029 | 0.5024 $\pm$ 0.0864 | 0.5025 $\pm$ 0.0862 | 0.0000 $\pm$ 0.0000 |
| MSCRED         | 0.0099 $\pm$ 0.0011 | 0.6883 $\pm$ 0.0361 | 0.6883 $\pm$ 0.0363 | 0.0000 $\pm$ 0.0000 |
| DAGMM          | 0.0072 $\pm$ 0.0029 | 0.2631 $\pm$ 0.0669 | 0.2630 $\pm$ 0.0666 | 0.0000 $\pm$ 0.0000 |

  

| Model          | PA-F1               | Event-based-F1      | R-based-F1          | Affiliation-F1      |
|----------------|---------------------|---------------------|---------------------|---------------------|
| CATCH          | 0.0000 $\pm$ 0.0000 | 0.0000 $\pm$ 0.0000 | 0.0000 $\pm$ 0.0000 | 0.9332 $\pm$ 0.0038 |
| M2N2           | 0.0000 $\pm$ 0.0000 | 0.0000 $\pm$ 0.0000 | 0.0000 $\pm$ 0.0000 | Nan $\pm$ NaN       |
| FITS           | 0.0000 $\pm$ 0.0000 | 0.0000 $\pm$ 0.0000 | 0.0000 $\pm$ 0.0000 | 0.7619 $\pm$ 0.1013 |
| ModernTCN      | 0.2940 $\pm$ 0.0347 | 0.0822 $\pm$ 0.0336 | 0.0210 $\pm$ 0.0001 | 0.9703 $\pm$ 0.0013 |
| Peri-midFormer | 0.1529 $\pm$ 0.2106 | 0.0214 $\pm$ 0.0298 | 0.0083 $\pm$ 0.0114 | 0.9682 $\pm$ 0.0017 |
| SARAD          | 0.2991 $\pm$ 0.4104 | 0.1415 $\pm$ 0.1965 | 0.0083 $\pm$ 0.0114 | 0.9389 $\pm$ 0.0360 |
| TimesNet       | 0.0000 $\pm$ 0.0000 | 0.0000 $\pm$ 0.0000 | 0.0000 $\pm$ 0.0000 | 0.8442 $\pm$ 0.0523 |
| OFA            | 0.1467 $\pm$ 0.3280 | 0.0400 $\pm$ 0.0894 | 0.0032 $\pm$ 0.0072 | 0.8031 $\pm$ 0.0757 |
| A.T.           | 0.0000 $\pm$ 0.0000 | 0.0000 $\pm$ 0.0000 | 0.0000 $\pm$ 0.0000 | 0.9499 $\pm$ NaN    |
| FGANomaly      | 0.2739 $\pm$ 0.1532 | 0.1135 $\pm$ 0.0660 | 0.0177 $\pm$ 0.0099 | 0.9842 $\pm$ 0.0018 |
| CAE-M          | 0.0000 $\pm$ 0.0000 | 0.0000 $\pm$ 0.0000 | 0.0000 $\pm$ 0.0000 | NaN $\pm$ NaN       |
| MTAD-GAT       | 1.0000 $\pm$ 0.0000 | 1.0000 $\pm$ 0.0000 | 0.0119 $\pm$ 0.0019 | 0.9990 $\pm$ 0.0003 |
| OmniAnomaly    | 0.0000 $\pm$ 0.0000 | 0.0000 $\pm$ 0.0000 | 0.0000 $\pm$ 0.0000 | 0.6452 $\pm$ 0.1220 |
| MSCRED         | 0.0000 $\pm$ 0.0000 | 0.0000 $\pm$ 0.0000 | 0.0000 $\pm$ 0.0000 | 0.3804 $\pm$ NaN    |
| DAGMM          | 0.0000 $\pm$ 0.0000 | 0.0000 $\pm$ 0.0000 | 0.0000 $\pm$ 0.0000 | 0.4275 $\pm$ 0.0554 |

Table 9: More results on dataset MSL without IGAD.

| Model          | AUC-PR              | AUC-ROC             | VUS-ROC             | Standard-F1         |
|----------------|---------------------|---------------------|---------------------|---------------------|
| CATCH          | 0.0286 $\pm$ 0.0008 | 0.7807 $\pm$ 0.0052 | 0.7806 $\pm$ 0.0052 | 0.0000 $\pm$ 0.0000 |
| M2N2           | 0.2024 $\pm$ 0.1532 | 0.9637 $\pm$ 0.0233 | 0.9637 $\pm$ 0.0233 | 0.0000 $\pm$ 0.0000 |
| FITS           | 0.0419 $\pm$ 0.0025 | 0.6946 $\pm$ 0.0192 | 0.6769 $\pm$ 0.0220 | 0.0356 $\pm$ 0.0076 |
| ModernTCN      | 0.1930 $\pm$ 0.0022 | 0.8792 $\pm$ 0.0012 | 0.8188 $\pm$ 0.0020 | 0.1676 $\pm$ 0.0020 |
| Peri-midFormer | 0.2004 $\pm$ 0.0063 | 0.8782 $\pm$ 0.0036 | 0.8198 $\pm$ 0.0028 | 0.1680 $\pm$ 0.0042 |
| SARAD          | 0.2766 $\pm$ 0.0128 | 0.9103 $\pm$ 0.0069 | 0.8264 $\pm$ 0.0113 | 0.3134 $\pm$ 0.0104 |
| TimesNet       | 0.0824 $\pm$ 0.0188 | 0.7583 $\pm$ 0.0170 | 0.7147 $\pm$ 0.0216 | 0.1294 $\pm$ 0.0373 |
| OFA            | 0.0630 $\pm$ 0.0030 | 0.6887 $\pm$ 0.0068 | 0.6778 $\pm$ 0.0072 | 0.1178 $\pm$ 0.0112 |
| A.T.           | 0.0266 $\pm$ 0.0053 | 0.5213 $\pm$ 0.0293 | 0.5175 $\pm$ 0.0240 | 0.0037 $\pm$ 0.0082 |
| FGANomaly      | 0.4943 $\pm$ 0.0063 | 0.9320 $\pm$ 0.0071 | 0.8790 $\pm$ 0.0143 | 0.4663 $\pm$ 0.0094 |
| CAE-M          | 0.1746 $\pm$ 0.1266 | 0.6676 $\pm$ 0.1213 | 0.5360 $\pm$ 0.1568 | 0.1268 $\pm$ 0.1049 |
| MTAD-GAT       | 0.3949 $\pm$ 0.0031 | 0.8710 $\pm$ 0.0043 | 0.8700 $\pm$ 0.0043 | 0.5150 $\pm$ 0.0048 |
| OmniAnomaly    | 0.2578 $\pm$ 0.0011 | 0.9003 $\pm$ 0.0025 | 0.8231 $\pm$ 0.0020 | 0.2798 $\pm$ 0.0017 |
| MSCRED         | 0.4373 $\pm$ 0.0293 | 0.9228 $\pm$ 0.0326 | 0.8517 $\pm$ 0.0271 | 0.3878 $\pm$ 0.0340 |
| DAGMM          | 0.0983 $\pm$ 0.0067 | 0.5554 $\pm$ 0.0136 | 0.4055 $\pm$ 0.0109 | 0.1041 $\pm$ 0.0080 |

  

| Model          | PA-F1               | Event-based-F1      | R-based-F1          | Affiliation-F1      |
|----------------|---------------------|---------------------|---------------------|---------------------|
| CATCH          | 0.0000 $\pm$ 0.0000 | 0.0000 $\pm$ 0.0000 | 0.0000 $\pm$ 0.0000 | 0.9332 $\pm$ 0.0040 |
| M2N2           | 0.0000 $\pm$ 0.0000 | 0.0000 $\pm$ 0.0000 | 0.0000 $\pm$ 0.0000 | Nan $\pm$ NaN       |
| FITS           | 0.4901 $\pm$ 0.0580 | 0.0768 $\pm$ 0.0153 | 0.0046 $\pm$ 0.0000 | 0.7382 $\pm$ 0.0113 |
| ModernTCN      | 0.3416 $\pm$ 0.0231 | 0.2309 $\pm$ 0.0115 | 0.0056 $\pm$ 0.0000 | 0.6316 $\pm$ 0.0002 |
| Peri-midFormer | 0.5292 $\pm$ 0.0042 | 0.2522 $\pm$ 0.0027 | 0.0056 $\pm$ 0.0000 | 0.6411 $\pm$ 0.0023 |
| SARAD          | 0.4905 $\pm$ 0.0130 | 0.3904 $\pm$ 0.0142 | 0.0056 $\pm$ 0.0000 | 0.7315 $\pm$ 0.0249 |
| TimesNet       | 0.6230 $\pm$ 0.0434 | 0.2284 $\pm$ 0.0559 | 0.0047 $\pm$ 0.0000 | 0.8128 $\pm$ 0.0259 |
| OFA            | 0.6813 $\pm$ 0.0316 | 0.2243 $\pm$ 0.0241 | 0.0045 $\pm$ 0.0000 | 0.8178 $\pm$ 0.0129 |
| A.T.           | 0.1257 $\pm$ 0.2811 | 0.0182 $\pm$ 0.0407 | 0.0009 $\pm$ 0.0020 | 0.3300 $\pm$ 0.2620 |
| FGANomaly      | 0.5990 $\pm$ 0.0089 | 0.5588 $\pm$ 0.0201 | 0.0056 $\pm$ 0.0000 | 0.7236 $\pm$ 0.0351 |
| CAE-M          | 0.3072 $\pm$ 0.1654 | 0.2522 $\pm$ 0.1607 | 0.0311 $\pm$ 0.0147 | 0.2562 $\pm$ 0.1743 |
| MTAD-GAT       | 0.8556 $\pm$ 0.0044 | 0.7075 $\pm$ 0.0070 | 0.0046 $\pm$ 0.0000 | 0.9264 $\pm$ 0.0007 |
| OmniAnomaly    | 1.0000 $\pm$ 0.0000 | 1.0000 $\pm$ 0.0000 | 0.3893 $\pm$ 0.0526 | 0.9961 $\pm$ 0.0011 |
| MSCRED         | 0.6846 $\pm$ 0.0686 | 0.5927 $\pm$ 0.0695 | 0.0056 $\pm$ 0.0000 | 0.7394 $\pm$ 0.0799 |
| DAGMM          | 0.2317 $\pm$ 0.0012 | 0.1778 $\pm$ 0.0014 | 0.0406 $\pm$ 0.0008 | 0.1789 $\pm$ 0.0003 |

Table 10: More results on dataset PSM with IGAD.

| Model          | AUC-PR              | AUC-ROC             | VUS-ROC             | Standard-F1         |
|----------------|---------------------|---------------------|---------------------|---------------------|
| CATCH          | 0.1380 $\pm$ 0.0030 | 0.5680 $\pm$ 0.0102 | 0.4974 $\pm$ 0.0099 | 0.0257 $\pm$ 0.0027 |
| M2N2           | 0.4124 $\pm$ 0.0252 | 0.8527 $\pm$ 0.0024 | 0.7793 $\pm$ 0.0063 | 0.0548 $\pm$ 0.0272 |
| FITS           | 0.1203 $\pm$ 0.0005 | 0.5137 $\pm$ 0.0020 | 0.4559 $\pm$ 0.0104 | 0.0144 $\pm$ 0.0006 |
| ModernTCN      | 0.1408 $\pm$ 0.0002 | 0.5659 $\pm$ 0.0004 | 0.4938 $\pm$ 0.0005 | 0.0291 $\pm$ 0.0001 |
| Peri-midFormer | 0.1378 $\pm$ 0.0003 | 0.5520 $\pm$ 0.0009 | 0.4909 $\pm$ 0.0035 | 0.0338 $\pm$ 0.0005 |
| SARAD          | 0.1787 $\pm$ 0.0095 | 0.6627 $\pm$ 0.0186 | 0.4476 $\pm$ 0.0155 | 0.0310 $\pm$ 0.0021 |
| TimesNet       | 0.1355 $\pm$ 0.0076 | 0.5516 $\pm$ 0.0151 | 0.4839 $\pm$ 0.0141 | 0.0259 $\pm$ 0.0070 |
| OFA            | 0.1490 $\pm$ 0.0108 | 0.5700 $\pm$ 0.0180 | 0.5147 $\pm$ 0.0208 | 0.0145 $\pm$ 0.0057 |
| A.T.           | 0.1809 $\pm$ 0.0739 | 0.6199 $\pm$ 0.0833 | 0.5028 $\pm$ 0.0635 | 0.1100 $\pm$ 0.1421 |
| FGANomaly      | 0.2401 $\pm$ 0.0235 | 0.7214 $\pm$ 0.0110 | 0.5769 $\pm$ 0.0106 | 0.0067 $\pm$ 0.0055 |
| CAE-M          | 0.1773 $\pm$ 0.0376 | 0.6427 $\pm$ 0.0402 | 0.4493 $\pm$ 0.0245 | 0.0275 $\pm$ 0.0117 |
| MTAD-GAT       | 0.1904 $\pm$ 0.0509 | 0.6783 $\pm$ 0.0665 | 0.6099 $\pm$ 0.0623 | 0.0284 $\pm$ 0.0017 |
| OmniAnomaly    | 0.1659 $\pm$ 0.0006 | 0.6233 $\pm$ 0.0037 | 0.4324 $\pm$ 0.0073 | 0.0257 $\pm$ 0.0001 |
| MSCRED         | 0.1928 $\pm$ 0.0246 | 0.7115 $\pm$ 0.0335 | 0.5034 $\pm$ 0.0550 | 0.0220 $\pm$ 0.0124 |
| DAGMM          | 0.2116 $\pm$ 0.0047 | 0.6913 $\pm$ 0.0045 | 0.4736 $\pm$ 0.0070 | 0.0375 $\pm$ 0.0050 |

  

| Model          | PA-F1               | Event-based-F1      | R-based-F1          | Affiliation-F1      |
|----------------|---------------------|---------------------|---------------------|---------------------|
| CATCH          | 0.3629 $\pm$ 0.0010 | 0.0990 $\pm$ 0.0084 | 0.0032 $\pm$ 0.0000 | 0.1300 $\pm$ 0.0100 |
| M2N2           | 0.3320 $\pm$ 0.0000 | 0.0274 $\pm$ 0.0000 | 0.0069 $\pm$ 0.0010 | 0.0215 $\pm$ 0.0011 |
| FITS           | 0.7490 $\pm$ 0.0155 | 0.1197 $\pm$ 0.0086 | 0.0030 $\pm$ 0.0000 | 0.3014 $\pm$ 0.0270 |
| ModernTCN      | 0.3624 $\pm$ 0.0001 | 0.1077 $\pm$ 0.0002 | 0.0032 $\pm$ 0.0000 | 0.1360 $\pm$ 0.0000 |
| Peri-midFormer | 0.3640 $\pm$ 0.0001 | 0.1300 $\pm$ 0.0068 | 0.0032 $\pm$ 0.0000 | 0.1686 $\pm$ 0.0116 |
| SARAD          | 0.3313 $\pm$ 0.0039 | 0.0710 $\pm$ 0.0018 | 0.0032 $\pm$ 0.0000 | 0.1130 $\pm$ 0.0015 |
| TimesNet       | 0.8278 $\pm$ 0.0434 | 0.1563 $\pm$ 0.0212 | 0.0031 $\pm$ 0.0001 | 0.3117 $\pm$ 0.0466 |
| OFA            | 0.8248 $\pm$ 0.0810 | 0.1879 $\pm$ 0.0471 | 0.0031 $\pm$ 0.0000 | 0.3150 $\pm$ 0.0950 |
| A.T.           | 0.3841 $\pm$ 0.2627 | 0.1285 $\pm$ 0.1321 | 0.0023 $\pm$ 0.0013 | 0.3753 $\pm$ 0.3316 |
| FGANomaly      | 0.2710 $\pm$ 0.1519 | 0.0360 $\pm$ 0.0244 | 0.0031 $\pm$ 0.0018 | 0.0634 $\pm$ 0.0258 |
| CAE-M          | 0.2783 $\pm$ 0.1384 | 0.0730 $\pm$ 0.0308 | 0.0032 $\pm$ 0.0001 | 0.1079 $\pm$ 0.0242 |
| MTAD-GAT       | 0.7170 $\pm$ 0.0350 | 0.1424 $\pm$ 0.0388 | 0.0032 $\pm$ 0.0000 | 0.2223 $\pm$ 0.0190 |
| OmniAnomaly    | 0.0355 $\pm$ 0.0001 | 0.0409 $\pm$ 0.0002 | 0.0031 $\pm$ 0.0000 | 0.0750 $\pm$ 0.0000 |
| MSCRED         | 0.1744 $\pm$ 0.1606 | 0.0523 $\pm$ 0.0242 | 0.0032 $\pm$ 0.0002 | 0.0945 $\pm$ 0.0226 |
| DAGMM          | 0.3400 $\pm$ 0.0016 | 0.0794 $\pm$ 0.0026 | 0.0032 $\pm$ 0.0000 | 0.1168 $\pm$ 0.0027 |

Table 11: More results on dataset PSM without IGAD.

| Model          | AUC-PR              | AUC-ROC             | VUS-ROC             | Standard-F1         |
|----------------|---------------------|---------------------|---------------------|---------------------|
| CATCH          | 0.1323 $\pm$ 0.0036 | 0.5514 $\pm$ 0.0096 | 0.5044 $\pm$ 0.0091 | 0.0194 $\pm$ 0.0116 |
| M2N2           | 0.3915 $\pm$ 0.0135 | 0.8464 $\pm$ 0.0033 | 0.7856 $\pm$ 0.0033 | 0.0648 $\pm$ 0.0000 |
| FITS           | 0.1180 $\pm$ 0.0004 | 0.5083 $\pm$ 0.0009 | 0.4732 $\pm$ 0.0014 | 0.0104 $\pm$ 0.0003 |
| ModernTCN      | 0.1463 $\pm$ 0.0003 | 0.5742 $\pm$ 0.0005 | 0.5101 $\pm$ 0.0019 | 0.0316 $\pm$ 0.0003 |
| Peri-midFormer | 0.1378 $\pm$ 0.0004 | 0.5511 $\pm$ 0.0014 | 0.4910 $\pm$ 0.0042 | 0.0349 $\pm$ 0.0005 |
| SARAD          | 0.1568 $\pm$ 0.0135 | 0.6524 $\pm$ 0.0268 | 0.4493 $\pm$ 0.0097 | 0.0290 $\pm$ 0.0012 |
| TimesNet       | 0.1211 $\pm$ 0.0022 | 0.5136 $\pm$ 0.0038 | 0.4610 $\pm$ 0.0048 | 0.0173 $\pm$ 0.0028 |
| OFA            | 0.1310 $\pm$ 0.0004 | 0.5390 $\pm$ 0.0005 | 0.4772 $\pm$ 0.0015 | 0.0110 $\pm$ 0.0006 |
| A.T.           | 0.1162 $\pm$ 0.0094 | 0.5161 $\pm$ 0.0360 | 0.4875 $\pm$ 0.0281 | 0.0000 $\pm$ 0.0000 |
| FGANomaly      | 0.2620 $\pm$ 0.0119 | 0.7480 $\pm$ 0.0082 | 0.5993 $\pm$ 0.0080 | 0.0031 $\pm$ 0.0012 |
| CAE-M          | 0.1608 $\pm$ 0.0009 | 0.6548 $\pm$ 0.0018 | 0.4682 $\pm$ 0.0025 | 0.0248 $\pm$ 0.0004 |
| MTAD-GAT       | 0.1495 $\pm$ 0.0023 | 0.6126 $\pm$ 0.0056 | 0.5373 $\pm$ 0.0069 | 0.0255 $\pm$ 0.0005 |
| OmniAnomaly    | 0.1655 $\pm$ 0.0010 | 0.6218 $\pm$ 0.0031 | 0.4314 $\pm$ 0.0083 | 0.0257 $\pm$ 0.0001 |
| MSCRED         | 0.2165 $\pm$ 0.0100 | 0.7431 $\pm$ 0.0197 | 0.5425 $\pm$ 0.0456 | 0.0220 $\pm$ 0.0095 |
| DAGMM          | 0.2126 $\pm$ 0.0025 | 0.6912 $\pm$ 0.0044 | 0.4765 $\pm$ 0.0040 | 0.0350 $\pm$ 0.0006 |

  

| Model          | PA-F1               | Event-based-F1      | R-based-F1          | Affiliation-F1      |
|----------------|---------------------|---------------------|---------------------|---------------------|
| CATCH          | 0.7125 $\pm$ 0.2074 | 0.1237 $\pm$ 0.0276 | 0.0031 $\pm$ 0.0001 | 0.2804 $\pm$ 0.1142 |
| M2N2           | 0.3320 $\pm$ 0.0000 | 0.0274 $\pm$ 0.0000 | 0.0073 $\pm$ 0.0000 | 0.0219 $\pm$ 0.0000 |
| FITS           | 0.8835 $\pm$ 0.0004 | 0.2184 $\pm$ 0.0080 | 0.0031 $\pm$ 0.0000 | 0.5232 $\pm$ 0.0069 |
| ModernTCN      | 0.3639 $\pm$ 0.0007 | 0.1138 $\pm$ 0.0073 | 0.0032 $\pm$ 0.0000 | 0.1757 $\pm$ 0.0161 |
| Peri-midFormer | 0.3642 $\pm$ 0.0002 | 0.1397 $\pm$ 0.0162 | 0.0032 $\pm$ 0.0000 | 0.1911 $\pm$ 0.0249 |
| SARAD          | 0.1074 $\pm$ 0.1207 | 0.0569 $\pm$ 0.0049 | 0.0032 $\pm$ 0.0000 | 0.1015 $\pm$ 0.0059 |
| TimesNet       | 0.8550 $\pm$ 0.0021 | 0.1648 $\pm$ 0.0074 | 0.0031 $\pm$ 0.0000 | 0.4767 $\pm$ 0.0394 |
| OFA            | 0.8683 $\pm$ 0.0048 | 0.1960 $\pm$ 0.0082 | 0.0031 $\pm$ 0.0000 | 0.5743 $\pm$ 0.0147 |
| A.T.           | 0.0664 $\pm$ 0.1484 | 0.0050 $\pm$ 0.0112 | 0.0004 $\pm$ 0.0009 | 0.0792 $\pm$ NaN    |
| FGANomaly      | 0.3214 $\pm$ 0.0014 | 0.0200 $\pm$ 0.0029 | 0.0028 $\pm$ 0.0000 | 0.0386 $\pm$ 0.0008 |
| CAE-M          | 0.3148 $\pm$ 0.0006 | 0.0547 $\pm$ 0.0001 | 0.0035 $\pm$ 0.0000 | 0.0944 $\pm$ 0.0000 |
| MTAD-GAT       | 0.3319 $\pm$ 0.0016 | 0.0874 $\pm$ 0.0019 | 0.0032 $\pm$ 0.0000 | 0.1823 $\pm$ 0.0002 |
| OmniAnomaly    | 0.0355 $\pm$ 0.0001 | 0.0409 $\pm$ 0.0002 | 0.0031 $\pm$ 0.0000 | 0.0750 $\pm$ 0.0000 |
| MSCRED         | 0.3461 $\pm$ 0.0249 | 0.0633 $\pm$ 0.0130 | 0.0032 $\pm$ 0.0001 | 0.1150 $\pm$ 0.0204 |
| DAGMM          | 0.3397 $\pm$ 0.0005 | 0.0780 $\pm$ 0.0002 | 0.0032 $\pm$ 0.0000 | 0.1140 $\pm$ 0.0002 |

Table 12: More results on dataset SMAP with IGAD.

| Model          | AUC-PR              | AUC-ROC             | VUS-ROC             | Standard-F1         |
|----------------|---------------------|---------------------|---------------------|---------------------|
| CATCH          | 0.2942 $\pm$ 0.0008 | 0.6088 $\pm$ 0.0017 | 0.6088 $\pm$ 0.0017 | 0.1329 $\pm$ 0.0020 |
| M2N2           | 0.1971 $\pm$ 0.0427 | 0.6754 $\pm$ 0.0868 | 0.6753 $\pm$ 0.0869 | 0.0000 $\pm$ 0.0000 |
| FITS           | 0.2858 $\pm$ 0.0126 | 0.7845 $\pm$ 0.0196 | 0.7845 $\pm$ 0.0197 | 0.0194 $\pm$ 0.0045 |
| ModernTCN      | 0.4165 $\pm$ 0.0079 | 0.8004 $\pm$ 0.0053 | 0.8004 $\pm$ 0.0054 | 0.2067 $\pm$ 0.0025 |
| Peri-midFormer | 0.5096 $\pm$ 0.0273 | 0.8312 $\pm$ 0.0129 | 0.8298 $\pm$ 0.0130 | 0.1971 $\pm$ 0.0030 |
| SARAD          | 0.8437 $\pm$ 0.0213 | 0.9320 $\pm$ 0.0060 | 0.9337 $\pm$ 0.0060 | 0.2425 $\pm$ 0.0064 |
| TimesNet       | 0.2731 $\pm$ 0.0672 | 0.7194 $\pm$ 0.0970 | 0.7194 $\pm$ 0.0970 | 0.0330 $\pm$ 0.0197 |
| OFA            | 0.2977 $\pm$ 0.0254 | 0.7897 $\pm$ 0.0326 | 0.7897 $\pm$ 0.0326 | 0.0425 $\pm$ 0.0138 |
| A.T.           | 0.2557 $\pm$ 0.1120 | 0.6327 $\pm$ 0.0959 | 0.6326 $\pm$ 0.0961 | 0.0439 $\pm$ 0.0884 |
| FGANomaly      | 0.9840 $\pm$ 0.0012 | 0.9957 $\pm$ 0.0006 | 0.9957 $\pm$ 0.0006 | 0.3473 $\pm$ 0.0099 |
| CAE-M          | 0.0718 $\pm$ 0.0002 | 0.0203 $\pm$ 0.0141 | 0.0203 $\pm$ 0.0141 | 0.0000 $\pm$ 0.0000 |
| MTAD-GAT       | 0.5121 $\pm$ 0.2364 | 0.8976 $\pm$ 0.0501 | 0.8976 $\pm$ 0.0501 | 0.0718 $\pm$ 0.0659 |
| OmniAnomaly    | 0.9064 $\pm$ 0.0272 | 0.9111 $\pm$ 0.0284 | 0.9111 $\pm$ 0.0284 | 0.4186 $\pm$ 0.1677 |
| MSCRED         | 0.1248 $\pm$ 0.0207 | 0.3914 $\pm$ 0.1556 | 0.3914 $\pm$ 0.1556 | 0.0000 $\pm$ 0.0000 |
| DAGMM          | 0.1106 $\pm$ 0.0124 | 0.0597 $\pm$ 0.0144 | 0.0597 $\pm$ 0.0144 | 0.0225 $\pm$ 0.0311 |

  

| Model          | PA-F1               | Event-based-F1      | R-based-F1          | Affiliation-F1      |
|----------------|---------------------|---------------------|---------------------|---------------------|
| CATCH          | 1.0000 $\pm$ 0.0000 | 1.0000 $\pm$ 0.0000 | 0.3063 $\pm$ 0.0027 | 0.9485 $\pm$ 0.0002 |
| M2N2           | 0.0000 $\pm$ 0.0000 | 0.0000 $\pm$ 0.0000 | 0.0000 $\pm$ 0.0000 | NaN $\pm$ NaN       |
| FITS           | 0.9020 $\pm$ 0.0015 | 0.0988 $\pm$ 0.0209 | 0.1662 $\pm$ 0.0007 | 0.5542 $\pm$ 0.0163 |
| ModernTCN      | 0.9986 $\pm$ 0.0005 | 0.9879 $\pm$ 0.0040 | 0.3322 $\pm$ 0.0008 | 0.9484 $\pm$ 0.0005 |
| Peri-midFormer | 0.9998 $\pm$ 0.0002 | 0.9984 $\pm$ 0.0022 | 0.3288 $\pm$ 0.0011 | 0.9498 $\pm$ 0.0002 |
| SARAD          | 0.9989 $\pm$ 0.0009 | 0.9922 $\pm$ 0.0063 | 0.3435 $\pm$ 0.0021 | 0.9492 $\pm$ 0.0009 |
| TimesNet       | 0.9183 $\pm$ 0.0165 | 0.1839 $\pm$ 0.1134 | 0.1682 $\pm$ 0.0027 | 0.5879 $\pm$ 0.0432 |
| OFA            | 0.9151 $\pm$ 0.0135 | 0.2188 $\pm$ 0.0699 | 0.1690 $\pm$ 0.0019 | 0.6027 $\pm$ 0.0358 |
| A.T.           | 0.7826 $\pm$ 0.4380 | 0.2615 $\pm$ 0.3943 | 0.1362 $\pm$ 0.0768 | 0.6389 $\pm$ 0.1989 |
| FGANomaly      | 1.0000 $\pm$ 0.0000 | 1.0000 $\pm$ 0.0000 | 0.3724 $\pm$ 0.0032 | 0.9955 $\pm$ 0.0001 |
| CAE-M          | 0.0000 $\pm$ 0.0000 | 0.0000 $\pm$ 0.0000 | 0.0000 $\pm$ 0.0000 | NaN $\pm$ NaN       |
| MTAD-GAT       | 0.9480 $\pm$ 0.0293 | 0.4098 $\pm$ 0.3328 | 0.1997 $\pm$ 0.0676 | 0.6742 $\pm$ 0.1815 |
| OmniAnomaly    | 1.0000 $\pm$ 0.0000 | 1.0000 $\pm$ 0.0000 | 0.3893 $\pm$ 0.0526 | 0.9961 $\pm$ 0.0011 |
| MSCRED         | 0.0000 $\pm$ 0.0000 | 0.0000 $\pm$ 0.0000 | 0.0000 $\pm$ 0.0000 | 0.3334 $\pm$ 0.0001 |
| DAGMM          | 0.4000 $\pm$ 0.5477 | 0.4000 $\pm$ 0.5477 | 0.1096 $\pm$ 0.1500 | 0.9490 $\pm$ 0.0000 |

Table 13: More results on dataset SMAP without IGAD.

| Model          | AUC-PR              | AUC-ROC             | VUS-ROC             | Standard-F1         |
|----------------|---------------------|---------------------|---------------------|---------------------|
| CATCH          | 0.2898 $\pm$ 0.0013 | 0.5913 $\pm$ 0.0052 | 0.5912 $\pm$ 0.0052 | 0.1410 $\pm$ 0.0051 |
| M2N2           | 0.1954 $\pm$ 0.0056 | 0.6345 $\pm$ 0.0123 | 0.6344 $\pm$ 0.0123 | 0.0909 $\pm$ 0.0081 |
| FITS           | 0.2713 $\pm$ 0.0115 | 0.7675 $\pm$ 0.0154 | 0.7675 $\pm$ 0.0154 | 0.0203 $\pm$ 0.0048 |
| ModernTCN      | 0.4594 $\pm$ 0.0098 | 0.8220 $\pm$ 0.0051 | 0.8220 $\pm$ 0.0050 | 0.1746 $\pm$ 0.0053 |
| Peri-midFormer | 0.5105 $\pm$ 0.0288 | 0.8304 $\pm$ 0.0132 | 0.8304 $\pm$ 0.0133 | 0.1977 $\pm$ 0.0044 |
| SARAD          | 0.8490 $\pm$ 0.0184 | 0.9335 $\pm$ 0.0053 | 0.9335 $\pm$ 0.0053 | 0.2462 $\pm$ 0.0076 |
| TimesNet       | 0.2677 $\pm$ 0.0742 | 0.7256 $\pm$ 0.0993 | 0.7256 $\pm$ 0.0993 | 0.0297 $\pm$ 0.0168 |
| OFA            | 0.2959 $\pm$ 0.0256 | 0.7949 $\pm$ 0.0254 | 0.7949 $\pm$ 0.0254 | 0.0442 $\pm$ 0.0148 |
| A.T.           | 0.2397 $\pm$ 0.0828 | 0.5897 $\pm$ 0.0911 | 0.5895 $\pm$ 0.0913 | 0.0810 $\pm$ 0.1053 |
| FGANomaly      | 0.9208 $\pm$ 0.0270 | 0.9560 $\pm$ 0.0060 | 0.9560 $\pm$ 0.0060 | 0.0606 $\pm$ 0.0012 |
| CAE-M          | 0.0719 $\pm$ 0.0002 | 0.0218 $\pm$ 0.0157 | 0.0218 $\pm$ 0.0157 | 0.0000 $\pm$ 0.0000 |
| MTAD-GAT       | 0.2324 $\pm$ 0.0271 | 0.6605 $\pm$ 0.0518 | 0.6604 $\pm$ 0.0518 | 0.0340 $\pm$ 0.0008 |
| OmniAnomaly    | 0.0764 $\pm$ 0.0002 | 0.1057 $\pm$ 0.0002 | 0.1057 $\pm$ 0.0002 | 0.0000 $\pm$ 0.0000 |
| MSCRED         | 0.0936 $\pm$ 0.0011 | 0.1213 $\pm$ 0.0001 | 0.1213 $\pm$ 0.0001 | 0.0000 $\pm$ 0.0000 |
| DAGMM          | 0.0746 $\pm$ 0.0032 | 0.0242 $\pm$ 0.0042 | 0.0242 $\pm$ 0.0043 | 0.0018 $\pm$ 0.0025 |

  

| Model          | PA-F1               | Event-based-F1      | R-based-F1          | Affiliation-F1      |
|----------------|---------------------|---------------------|---------------------|---------------------|
| CATCH          | 1.0000 $\pm$ 0.0000 | 1.0000 $\pm$ 0.0000 | 0.3093 $\pm$ 0.0042 | 0.9489 $\pm$ 0.0002 |
| M2N2           | 0.8854 $\pm$ 0.0087 | 0.3166 $\pm$ 0.0229 | 0.1884 $\pm$ 0.0014 | 0.7227 $\pm$ 0.0062 |
| FITS           | 0.9022 $\pm$ 0.0017 | 0.1029 $\pm$ 0.0215 | 0.1664 $\pm$ 0.0008 | 0.5547 $\pm$ 0.0177 |
| ModernTCN      | 1.0000 $\pm$ 0.0000 | 1.0000 $\pm$ 0.0000 | 0.3197 $\pm$ 0.0041 | 0.9500 $\pm$ 0.0003 |
| Peri-midFormer | 0.9998 $\pm$ 0.0002 | 0.9984 $\pm$ 0.0022 | 0.3291 $\pm$ 0.0016 | 0.9498 $\pm$ 0.0002 |
| SARAD          | 0.9992 $\pm$ 0.0006 | 0.9943 $\pm$ 0.0042 | 0.3447 $\pm$ 0.0025 | 0.9495 $\pm$ 0.0006 |
| TimesNet       | 0.9142 $\pm$ 0.0143 | 0.1597 $\pm$ 0.0884 | 0.1677 $\pm$ 0.0024 | 0.5771 $\pm$ 0.0349 |
| OFA            | 0.9179 $\pm$ 0.0129 | 0.2311 $\pm$ 0.0778 | 0.1692 $\pm$ 0.0021 | 0.6041 $\pm$ 0.0382 |
| A.T.           | 0.9865 $\pm$ 0.0131 | 0.6238 $\pm$ 0.3904 | 0.1939 $\pm$ 0.0414 | 0.7903 $\pm$ 0.1868 |
| FGANomaly      | 1.0000 $\pm$ 0.0000 | 1.0000 $\pm$ 0.0000 | 0.2745 $\pm$ 0.0004 | 0.9487 $\pm$ 0.0000 |
| CAE-M          | 0.0000 $\pm$ 0.0000 | 0.0000 $\pm$ 0.0000 | 0.0000 $\pm$ 0.0000 | NaN $\pm$ NaN       |
| MTAD-GAT       | 0.9059 $\pm$ 0.0014 | 0.1674 $\pm$ 0.0051 | 0.1685 $\pm$ 0.0001 | 0.5657 $\pm$ 0.0018 |
| OmniAnomaly    | 0.0000 $\pm$ 0.0000 | 0.0000 $\pm$ 0.0000 | 0.0000 $\pm$ 0.0000 | NaN $\pm$ NaN       |
| MSCRED         | 0.0000 $\pm$ 0.0000 | 0.0000 $\pm$ 0.0000 | 0.0000 $\pm$ 0.0000 | NaN $\pm$ NaN       |
| DAGMM          | 0.4000 $\pm$ 0.5477 | 0.4000 $\pm$ 0.5477 | 0.0991 $\pm$ 0.1358 | 0.9553 $\pm$ 0.0001 |



## E.2 Efficiency Evaluation

In this section, we compare the Training Time per Epoch ( $\mathcal{T}_{w/o}$ ,  $\mathcal{T}_w$ ), GPU usage ( $\mathcal{G}_{w/o}$ ,  $\mathcal{G}_w$ ), and CPU usage ( $\mathcal{C}_{w/o}$ ,  $\mathcal{C}_w$ ) before and after applying IGAD for each dataset and each model from Tab.14 to Tab.17. From the defined formulas shown as (7) and (8), a model will perform four additional mappings after the application of IGAD. More concretely, before integration with IGAD, a model performs a mapping  $f(x)$ , while  $f(x)$ ,  $f(z)$ ,  $f'(z)$ ,  $f(f'(z))$ , and  $f'(f(z))$  are carried out sequentially under the effect of IGAD. **While more operations are involved, the application of IGAD does not introduce additional parameters that need to be trained, as IGAD leverages a frozen copy of the training model.** IGAD introduces additional time and resource consumption due to the mapping associated with the manifold constraints, but **these costs occur only in the training phases. During inference, each model can perform only one mapping for reconstruction, calculate anomaly scores, and detect abnormal time points.** This means that a model with IGAD can achieve the same efficiency as the same model without IGAD during inference. For a dataset with larger scale, the time is possible to last longer.

In the evaluation of *Training Time per Epoch*, we find that in most cases, the models with IGAD show an increase in time of less than 10 seconds and in many cases, even less than 3 seconds per training epoch. The increase generally has limited impact on the overall training process, especially when higher performance is desired. Meanwhile, it is also indicated that OFA [74] tends to show a higher increase during one epoch. This phenomenon can be theoretically concluded as that the utilize of a pre-trained language model is more source-sensitive to fine-tune it for time series tasks. An additional fact shows that the PSM dataset needs more training time than SMD, MSL, and SMAP. The reason is that the data scale of the PSM dataset is larger than others, and the cumulative effect of multiple iterations in the same epoch and multiple mappings results in a longer training time. In the evaluation of *Max GPU Allocation for Training* and *Max CPU Allocation for Training*, different degrees of increase are listed. During these, the maximum GPU occupancy is around 8535.80 MB (about 8.34 GB), and the maximum CPU occupancy is around 537.44 MB (about 0.52GB). All experiments are performed with a single NVIDIA RTX 3090 24GB GPU, and 0.52 GB is also acceptable for most hardware conditions for deep learning currently. These additional GPU and CPU memories are selected to save frozen parameters, gradient graphs, and data segments to update the training model.

Meanwhile, we have also envisioned some potential strategies to reduce these additional computational costs in our future implementations: (1) Accelerate calculation by data and model parallelism; (2) For large models such as OFA [74], we can perform parameter-efficient fine-tuning with advanced methods, including [33, 19, 55] based on LoRA [23] to reduce the number of trainable parameters; (3) A memory mechanism can be included to reduce the number of true reconstructions. Concretely, when a piece of reconstructed time series is needed, we can index the memory module to generate this in terms of association.

Table 14: Efficiency evaluation on dataset SMD, comparing training time per epoch ( $\mathcal{T}_{w/o}$ ,  $\mathcal{T}_w$ ), GPU usage ( $\mathcal{G}_{w/o}$ ,  $\mathcal{G}_w$ ), and CPU usage ( $\mathcal{C}_{w/o}$ ,  $\mathcal{C}_w$ ) before and after applying IGAD.

| Model          | Training Time per Epoch (s) |                 |                                     | Max GPU Allocation for Training (MB) |                 |                                     | Max CPU Allocation for Training (MB) |                 |                                     |
|----------------|-----------------------------|-----------------|-------------------------------------|--------------------------------------|-----------------|-------------------------------------|--------------------------------------|-----------------|-------------------------------------|
|                | $\mathcal{T}_{w/o}$         | $\mathcal{T}_w$ | $\mathcal{T}_w - \mathcal{T}_{w/o}$ | $\mathcal{G}_{w/o}$                  | $\mathcal{G}_w$ | $\mathcal{G}_w - \mathcal{G}_{w/o}$ | $\mathcal{C}_{w/o}$                  | $\mathcal{C}_w$ | $\mathcal{C}_w - \mathcal{C}_{w/o}$ |
| CATCH          | 6.0878                      | 17.2277         | 11.1399                             | 3038.8540                            | 5317.9945       | 2279.1405                           | 2252.5469                            | 2362.8828       | 110.3359                            |
| M2N2           | 0.8424                      | 1.2809          | 0.4385                              | 6.5044                               | 10.9773         | 4.4729                              | 2190.1797                            | 2603.9336       | 413.7539                            |
| FITS           | 1.1934                      | 1.9876          | 0.7942                              | 19.0562                              | 39.9126         | 20.8564                             | 4719.1914                            | 4756.3789       | 37.1875                             |
| ModernTCN      | 3.4464                      | 9.9653          | 6.5188                              | 1679.2700                            | 6333.5298       | 4654.2598                           | 4776.7734                            | 4793.4648       | 16.6914                             |
| Peri-midFormer | 1.1767                      | 5.8734          | 4.6967                              | 289.3027                             | 8825.1006       | 8535.7979                           | 4773.2188                            | 4826.9961       | 53.7773                             |
| SARAD          | 1.4122                      | 2.5430          | 1.1308                              | 778.5454                             | 2392.6172       | 1614.0718                           | 4751.1641                            | 4766.2148       | 15.0508                             |
| TimesNet       | 1.3733                      | 2.6364          | 1.2632                              | 299.8774                             | 411.8228        | 111.9453                            | 4790.5352                            | 4832.9365       | 42.4013                             |
| OFA            | 3.6833                      | 21.4194         | 17.7361                             | 1918.6016                            | 6223.6816       | 4305.0801                           | 4863.4492                            | 4910.8242       | 47.3750                             |
| A.T.           | 2.0369                      | 3.9399          | 1.9030                              | 1834.0044                            | 4781.5825       | 2947.5781                           | 4760.8867                            | 4789.8633       | 28.9766                             |
| FGANomaly      | 1.6585                      | 2.1942          | 0.5357                              | 58.0522                              | 523.9907        | 465.9385                            | 4739.8789                            | 4746.5241       | 6.6452                              |
| CAE-M          | 0.9261                      | 1.2022          | 0.2761                              | 115.1748                             | 301.7012        | 186.5264                            | 4732.7109                            | 4749.4766       | 16.7656                             |
| MTAD-GAT       | 1.2675                      | 2.2031          | 0.9356                              | 599.8101                             | 2052.2046       | 1452.3945                           | 4775.2891                            | 4783.0039       | 7.7148                              |
| OmniAnomaly    | 1.0875                      | 1.8211          | 0.7336                              | 45.4243                              | 169.6577        | 124.2334                            | 4748.5391                            | 4760.3894       | 11.8503                             |
| MSCRED         | 2.8281                      | 10.2687         | 7.4406                              | 3314.2231                            | 8588.2192       | 5273.9961                           | 4742.3281                            | 4743.5591       | 1.2309                              |
| DAGMM          | 0.9995                      | 1.1030          | 0.1034                              | 10.8193                              | 21.5449         | 10.7256                             | 4698.9609                            | 4701.4883       | 2.5273                              |

Table 15: Efficiency evaluation on dataset MSL, comparing training time per epoch ( $\mathcal{T}_{w/o}$ ,  $\mathcal{T}_w$ ), GPU usage ( $\mathcal{G}_{w/o}$ ,  $\mathcal{G}_w$ ), and CPU usage ( $\mathcal{C}_{w/o}$ ,  $\mathcal{C}_w$ ) before and after applying IGAD.

| Model          | Training Time per Epoch (s) |                 |                                     | Max GPU Allocation for Training (MB) |                 |                                     | Max CPU Allocation for Training (MB) |                 |                                     |
|----------------|-----------------------------|-----------------|-------------------------------------|--------------------------------------|-----------------|-------------------------------------|--------------------------------------|-----------------|-------------------------------------|
|                | $\mathcal{T}_{w/o}$         | $\mathcal{T}_w$ | $\mathcal{T}_w - \mathcal{T}_{w/o}$ | $\mathcal{G}_{w/o}$                  | $\mathcal{G}_w$ | $\mathcal{G}_w - \mathcal{G}_{w/o}$ | $\mathcal{C}_{w/o}$                  | $\mathcal{C}_w$ | $\mathcal{C}_w - \mathcal{C}_{w/o}$ |
| CATCH          | 1.5938                      | 3.3659          | 1.7721                              | 4230.5103                            | 8037.9696       | 3807.4593                           | 2312.8828                            | 2560.7383       | 247.8555                            |
| M2N2           | 0.5443                      | 0.9091          | 0.3647                              | 12.1436                              | 20.9563         | 8.8127                              | 2193.8672                            | 2581.3945       | 387.5273                            |
| FITS           | 0.8837                      | 1.0449          | 0.1612                              | 28.5674                              | 58.7539         | 30.1865                             | 4731.3164                            | 4768.3633       | 37.0469                             |
| ModernTCN      | 1.2722                      | 2.3140          | 1.0418                              | 2438.2866                            | 9111.5781       | 6673.2915                           | 4776.7539                            | 4792.0039       | 15.2500                             |
| Peri-midFormer | 0.8942                      | 1.4531          | 0.5589                              | 725.4805                             | 4876.8081       | 4151.3276                           | 4819.9063                            | 4861.1347       | 41.2284                             |
| SARAD          | 0.9593                      | 1.1728          | 0.2136                              | 1113.1733                            | 3489.0684       | 2375.8950                           | 4747.0664                            | 4777.9102       | 30.8438                             |
| TimesNet       | 0.8971                      | 1.0556          | 0.1585                              | 303.2749                             | 419.8989        | 116.6240                            | 4789.4727                            | 4818.4922       | 29.0195                             |
| OFA            | 1.2976                      | 3.4958          | 2.1982                              | 1919.3901                            | 6229.9653       | 4310.5752                           | 4853.4688                            | 5387.6055       | 534.1367                            |
| A.T.           | 0.9892                      | 1.2458          | 0.2566                              | 1253.3545                            | 2974.2109       | 1720.8564                           | 4768.0742                            | 4797.3750       | 29.3008                             |
| FGANomaly      | 0.9215                      | 1.0265          | 0.1051                              | 59.7305                              | 165.9316        | 106.2012                            | 4728.4922                            | 4733.8086       | 5.3164                              |
| CAE-M          | 0.8479                      | 0.8915          | 0.0436                              | 165.8027                             | 435.1094        | 269.3066                            | 4754.1836                            | 4772.0156       | 17.8320                             |
| MTAD-GAT       | 0.8763                      | 1.0014          | 0.1251                              | 1006.0601                            | 3351.1172       | 2345.0571                           | 4759.7734                            | 4762.5593       | 2.7859                              |
| OmniAnomaly    | 0.8426                      | 0.9404          | 0.0978                              | 49.0093                              | 183.8770        | 134.8677                            | 4740.9492                            | 4768.8750       | 27.9258                             |
| MSCRED         | 1.2203                      | 2.3347          | 1.1144                              | 4697.5435                            | 12323.8037      | 7626.2603                           | 4767.2188                            | 4767.6367       | 0.4180                              |
| DAGMM          | 0.8396                      | 0.8602          | 0.0206                              | 15.6182                              | 32.5830         | 16.9648                             | 4727.1992                            | 4728.4023       | 1.2031                              |

Table 16: Efficiency evaluation on dataset PSM, comparing training time per epoch ( $\mathcal{T}_{w/o}$ ,  $\mathcal{T}_w$ ), GPU usage ( $\mathcal{G}_{w/o}$ ,  $\mathcal{G}_w$ ), and CPU usage ( $\mathcal{C}_{w/o}$ ,  $\mathcal{C}_w$ ) before and after applying IGAD.

| Model          | Training Time per Epoch (s) |                 |                                     | Max GPU Allocation for Training (MB) |                 |                                     | Max CPU Allocation for Training (MB) |                 |                                     |
|----------------|-----------------------------|-----------------|-------------------------------------|--------------------------------------|-----------------|-------------------------------------|--------------------------------------|-----------------|-------------------------------------|
|                | $\mathcal{T}_{w/o}$         | $\mathcal{T}_w$ | $\mathcal{T}_w - \mathcal{T}_{w/o}$ | $\mathcal{G}_{w/o}$                  | $\mathcal{G}_w$ | $\mathcal{G}_w - \mathcal{G}_{w/o}$ | $\mathcal{C}_{w/o}$                  | $\mathcal{C}_w$ | $\mathcal{C}_w - \mathcal{C}_{w/o}$ |
| CATCH          | 44.4446                     | 131.0026        | 86.5580                             | 2228.2168                            | 5258.5916       | 3030.3749                           | 2285.8203                            | 2389.8164       | 103.9961                            |
| M2N2           | 2.5754                      | 4.8112          | 2.2358                              | 3.7534                               | 8.4933          | 4.7399                              | 2229.9570                            | 2725.6836       | 495.7266                            |
| FITS           | 4.0280                      | 8.0651          | 4.0370                              | 12.5127                              | 26.6787         | 14.1660                             | 4739.9609                            | 4760.7305       | 20.7695                             |
| ModernTCN      | 15.9907                     | 54.3645         | 38.3737                             | 1105.6284                            | 4172.5288       | 3066.9004                           | 4769.9844                            | 4785.1836       | 15.1992                             |
| Peri-midFormer | 4.2939                      | 22.7822         | 18.4883                             | 146.5879                             | 583.9233        | 437.3354                            | 4780.7969                            | 4785.6680       | 4.8711                              |
| SARAD          | 4.9100                      | 14.7800         | 9.8700                              | 551.7329                             | 1610.5713       | 1058.8384                           | 4745.7266                            | 4748.1641       | 2.4375                              |
| TimesNet       | 5.4077                      | 16.3706         | 10.9629                             | 288.7642                             | 400.0938        | 111.3296                            | 4781.2070                            | 4791.6211       | 10.4141                             |
| OFA            | 24.8965                     | 225.4139        | 200.5174                            | 1917.9985                            | 6221.9976       | 4303.9990                           | 4872.3086                            | 5395.2734       | 522.9648                            |
| A.T.           | 13.7400                     | 34.3816         | 20.6416                             | 1870.1704                            | 4878.5933       | 3008.4229                           | 4787.3672                            | 4831.0295       | 43.6623                             |
| FGANomaly      | 9.6031                      | 15.4628         | 5.8597                              | 56.7183                              | 5440.7212       | 5384.0029                           | 4759.8750                            | 4766.3008       | 6.4258                              |
| CAE-M          | 1.7830                      | 3.0684          | 1.2854                              | 76.6055                              | 201.3789        | 124.7734                            | 4756.0391                            | 4762.5078       | 6.4688                              |
| MTAD-GAT       | 3.6808                      | 10.4775         | 6.7966                              | 374.0786                             | 1268.0796       | 894.0010                            | 4972.4648                            | 5000.8047       | 28.3398                             |
| OmniAnomaly    | 4.0156                      | 10.3294         | 6.3138                              | 43.8564                              | 159.6650        | 115.8086                            | 4752.7734                            | 4767.4421       | 14.6687                             |
| MSCRED         | 16.2451                     | 58.4670         | 42.2220                             | 2259.1724                            | 5729.1802       | 3470.0078                           | 4765.6328                            | 4765.6641       | 0.0313                              |
| DAGMM          | 1.8711                      | 3.0836          | 1.2125                              | 7.1514                               | 14.2622         | 7.1108                              | 4740.0156                            | 4758.8516       | 18.8359                             |

Table 17: Efficiency evaluation on dataset SMAP, comparing training time per epoch ( $\mathcal{T}_{w/o}$ ,  $\mathcal{T}_w$ ), GPU usage ( $\mathcal{G}_{w/o}$ ,  $\mathcal{G}_w$ ), and CPU usage ( $\mathcal{C}_{w/o}$ ,  $\mathcal{C}_w$ ) before and after applying IGAD.

| Model          | Training Time per Epoch (s) |                 |                                     | Max GPU Allocation for Training (MB) |                 |                                     | Max CPU Allocation for Training (MB) |                 |                                     |
|----------------|-----------------------------|-----------------|-------------------------------------|--------------------------------------|-----------------|-------------------------------------|--------------------------------------|-----------------|-------------------------------------|
|                | $\mathcal{T}_{w/o}$         | $\mathcal{T}_w$ | $\mathcal{T}_w - \mathcal{T}_{w/o}$ | $\mathcal{G}_{w/o}$                  | $\mathcal{G}_w$ | $\mathcal{G}_w - \mathcal{G}_{w/o}$ | $\mathcal{C}_{w/o}$                  | $\mathcal{C}_w$ | $\mathcal{C}_w - \mathcal{C}_{w/o}$ |
| CATCH          | 2.5922                      | 6.4548          | 3.8626                              | 2228.2236                            | 4565.1578       | 2336.9341                           | 2193.1484                            | 2210.7266       | 17.5781                             |
| M2N2           | 0.6537                      | 0.9807          | 0.3269                              | 3.7534                               | 7.4113          | 3.6579                              | 2158.4492                            | 2596.3633       | 437.9141                            |
| FITS           | 0.9403                      | 1.2141          | 0.2737                              | 13.1851                              | 26.6787         | 13.4937                             | 4717.2734                            | 4723.3047       | 6.0313                              |
| ModernTCN      | 1.6361                      | 3.5830          | 1.9468                              | 1105.6284                            | 4172.5288       | 3066.9004                           | 4753.0820                            | 4772.8477       | 19.7656                             |
| Peri-midFormer | 1.0926                      | 2.1401          | 1.0474                              | 1263.2222                            | 1407.9321       | 144.7100                            | 4773.3984                            | 4784.6780       | 11.2795                             |
| SARAD          | 1.0455                      | 1.4257          | 0.3802                              | 551.9321                             | 1610.5713       | 1058.6392                           | 4736.4648                            | 4750.1250       | 13.6602                             |
| TimesNet       | 1.0640                      | 1.6658          | 0.6017                              | 306.8296                             | 408.3438        | 101.5142                            | 4765.6133                            | 4771.3477       | 5.7344                              |
| OFA            | 2.2287                      | 10.4260         | 8.1973                              | 1917.9985                            | 6221.9976       | 4304.0000                           | 4855.8672                            | 5393.3086       | 537.4414                            |
| A.T.           | 1.3751                      | 2.2921          | 0.9170                              | 1936.3228                            | 5066.8916       | 3130.5688                           | 4766.0039                            | 4792.0977       | 26.0938                             |
| FGANomaly      | 1.1534                      | 1.3887          | 0.2354                              | 56.7046                              | 228.3887        | 171.6841                            | 4727.0039                            | 4740.8906       | 13.8867                             |
| CAE-M          | 0.8584                      | 0.9544          | 0.0960                              | 76.6055                              | 201.3789        | 124.7734                            | 4736.6563                            | 4746.7227       | 10.0664                             |
| MTAD-GAT       | 0.9592                      | 1.3120          | 0.3528                              | 374.0786                             | 1268.0796       | 894.0010                            | 4734.4883                            | 4738.7656       | 4.2773                              |
| OmniAnomaly    | 0.9489                      | 1.2228          | 0.2739                              | 43.8564                              | 159.6650        | 115.8086                            | 4728.8945                            | 4739.2734       | 10.3789                             |
| MSCRED         | 1.6051                      | 3.7906          | 2.1856                              | 2259.1724                            | 5729.1802       | 3470.0078                           | 4743.4219                            | 4744.6059       | 1.1841                              |
| DAGMM          | 0.8615                      | 0.9203          | 0.0588                              | 7.1514                               | 14.2622         | 7.1108                              | 4711.6016                            | 4737.3438       | 25.7422                             |

### E.3 Hyperparameter Analysis

Here, we list the instructions to choose the optimal  $\lambda_{idem}$ ,  $\lambda_{tight}$  and  $\alpha$  for a given dataset and select the model DAGMM [75] with dataset SMAP to show the analysis of hyperparameters. The results are displayed in Fig.8, Fig.9 and Fig.10.

First, in Fig.8, we calculate the frequency of  $\lambda_{idem}$ ,  $\lambda_{tight}$ , and  $\alpha$  for all the experiments conducted. The results indicate that, for most cases, the values of  $\lambda_{idem}$  are located in the interval  $[0.1, 0.5]$ , which means that a relatively smaller  $\lambda_{idem}$  may be better for new datasets. For the values of  $\lambda_{tight}$ , they focus mainly on the two endpoint values and maintain a relatively uniform distribution throughout the other central parts. Finally, a larger  $\alpha$  may be considered as a priority.

In the following part, the parameter sensitivity analysis conducted in the following also supports the instructions listed above. We show the results with mean and standard deviation in Fig.9, and 95% confidence intervals in Fig.10. Concretely, we fix two of  $\lambda_{idem}$ ,  $\lambda_{tight}$  and  $\alpha$  as the optimal values shown in Tab.5. Then, we vary the remaining one from 0.1 to 2.0 with a step of 0.1. For  $\lambda_{idem}$ , the model achieves the best performance when  $\lambda_{idem}$  is 0.1 (a smaller one). For  $\lambda_{tight}$ , with the tightness effect changing from loose to strict ( $\lambda_{tight}$  changing from small to large), the performance of the model changes from up to down. We attribute it to over tightness, which even drops out normal instances. For  $\alpha$ , it is clearly shown that the performance improves with larger  $\alpha$  and levels off when  $\alpha$  is greater than 1.5.

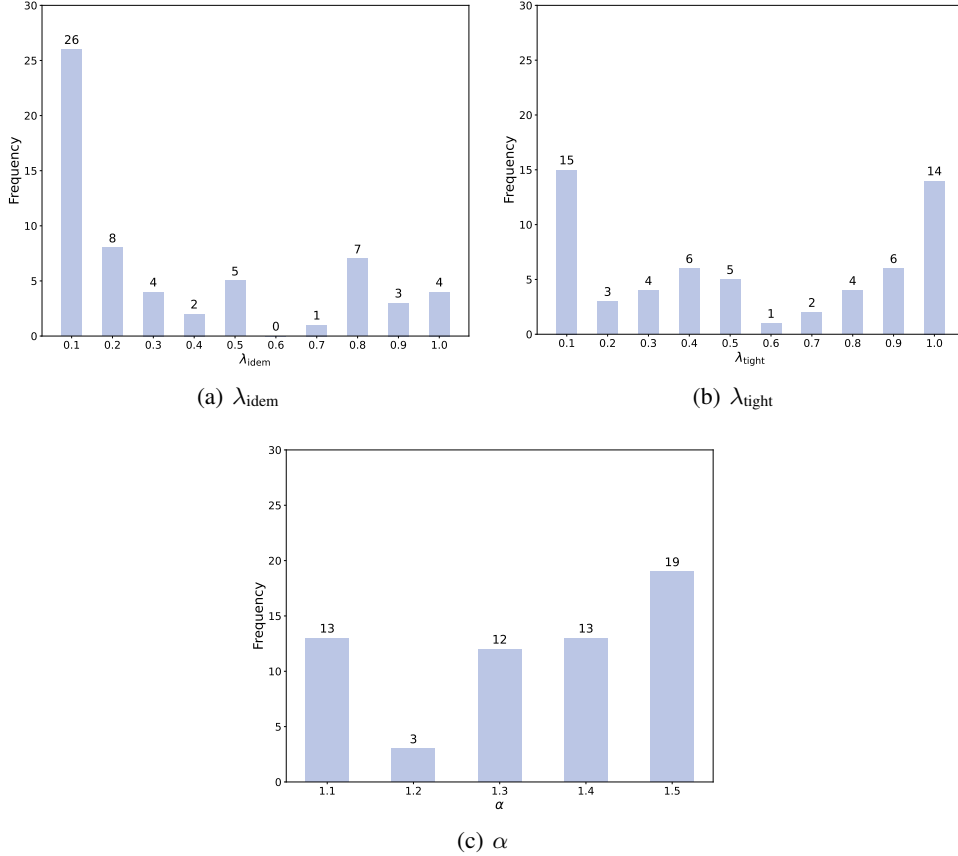

Figure 8: Parameter frequency records for  $\lambda_{idem}$ ,  $\lambda_{tight}$  and  $\alpha$ .

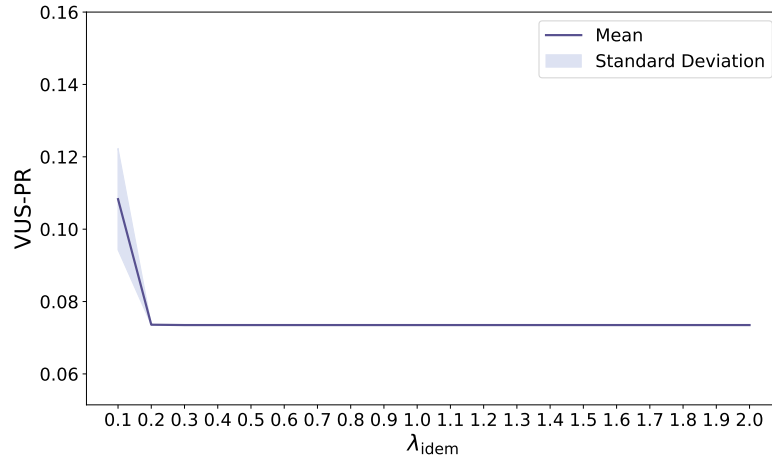

(a)  $\lambda_{idem}$

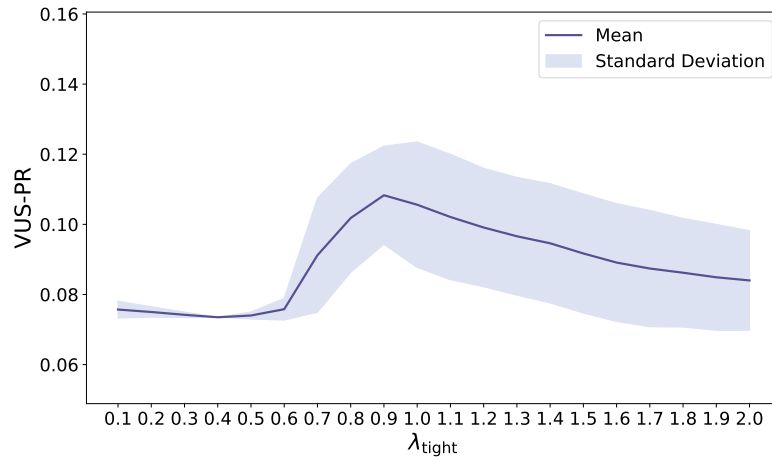

(b)  $\lambda_{tight}$

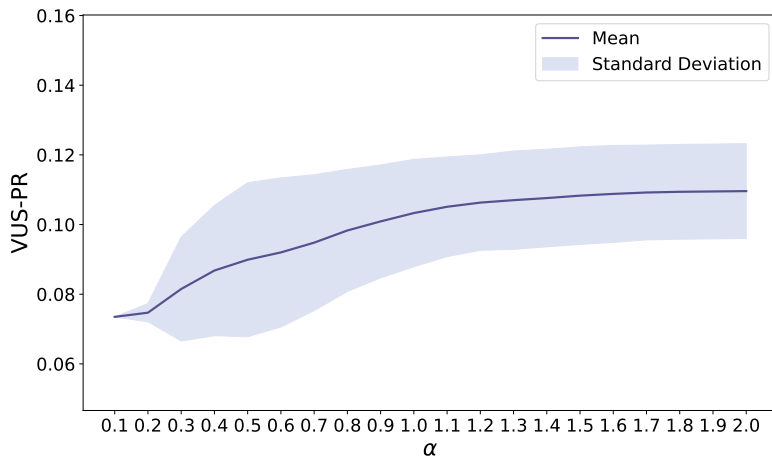

(c)  $\alpha$

Figure 9: Parameter sensitivity analysis for  $\lambda_{idem}$ ,  $\lambda_{tight}$  and  $\alpha$  with mean and standard deviation.

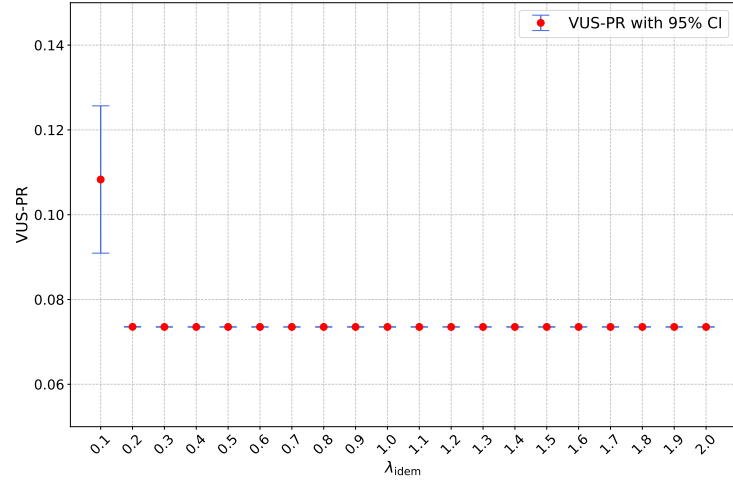

(a)  $\lambda_{idem}$

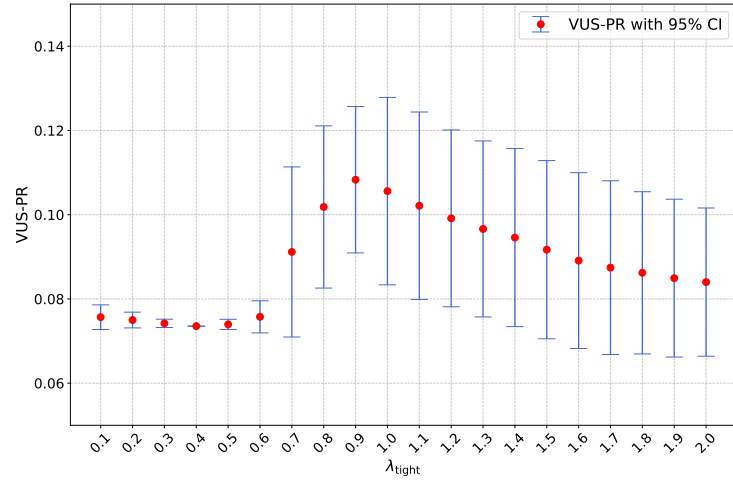

(b)  $\lambda_{tight}$

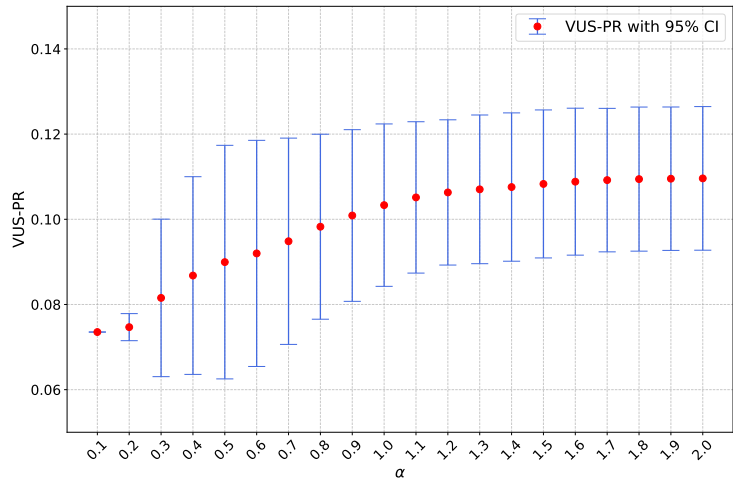

(c)  $\alpha$

Figure 10: Parameter sensitivity analysis for  $\lambda_{idem}$ ,  $\lambda_{tight}$  and  $\alpha$  with 95% confidence intervals.

#### E.4 Visualization of Latent Space

To further verify the effectiveness of IGAD, we visualize the latent space of different models before and after applying IGAD in Fig.11. It can be observed that, under the effect of IGAD, the model gains a clearer boundary to distinguish normal instances from abnormal instances. This aligns with our design principles to modify and tighten the target manifold  $\mathcal{M}_{\text{target}}$ , with the aim of containing enough normal instances and drop out potential abnormal instances.

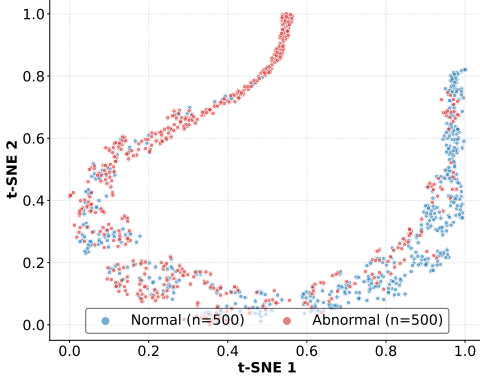

(a) DAGMM on SMD without IGAD.

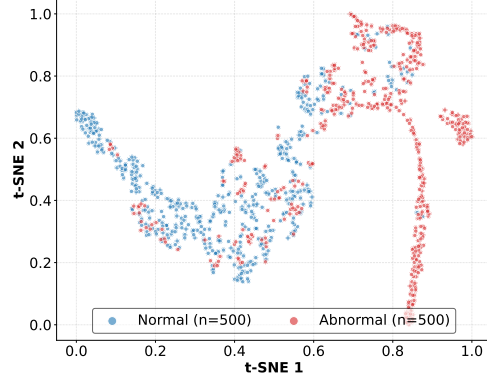

(b) DAGMM on SMD with IGAD.

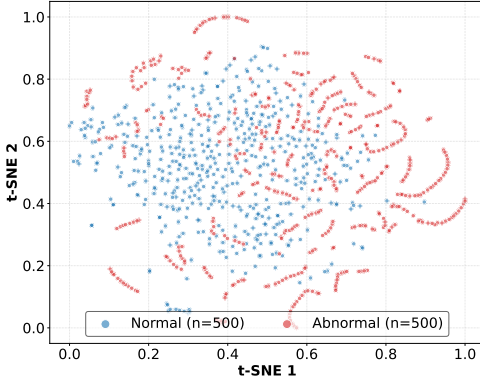

(c) OFA on SMD without IGAD.

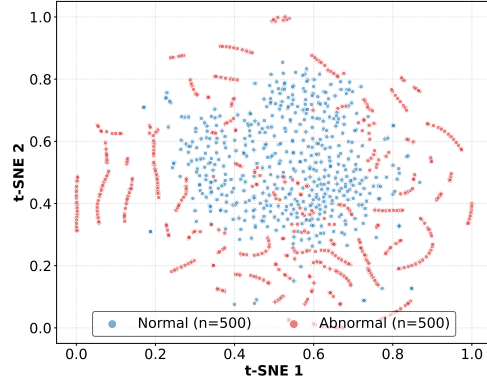

(d) OFA on SMD with IGAD.

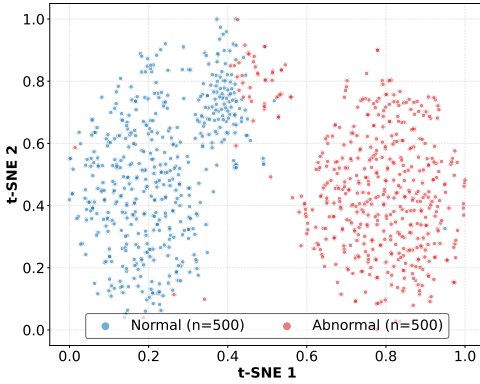

(e) OmniAnomaly on SMAP without IGAD.

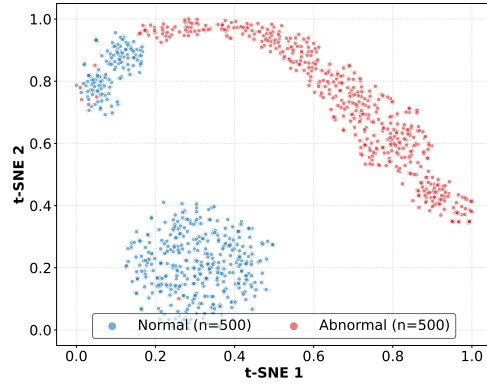

(f) OmniAnomaly on SMAP with IGAD.

Figure 11: The visualization of latent space using t-SNE before and after applying IGAD.

## E.5 Maintain Data Patterns under Noise

In our experiments to demonstrate that IGAD can help balance robustness and sensitivity in Sect.4.2.3, we have incorporated a noise strategy into the testing data. In this part, we employ heatmaps to show these data with weighted noise from Fig.12 to Fig.15. We have found that noise-effected testing data display similar change patterns with the original data, which means that our noise strategy can verify their abilities to balance the robustness and sensitivity of different models while maintaining the necessary information.

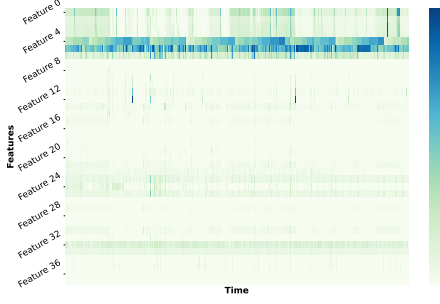

(a) Original time series data.

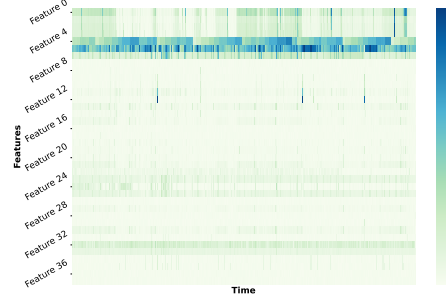

(b) Time series data with noise weight 1%.

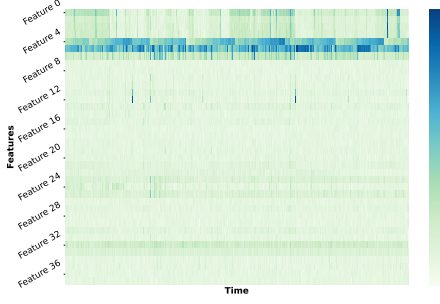

(c) Time series data with noise weight 5%.

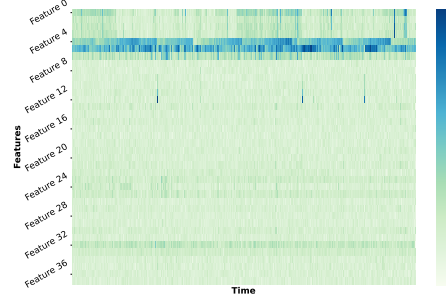

(d) Time series data with noise weight 10%.

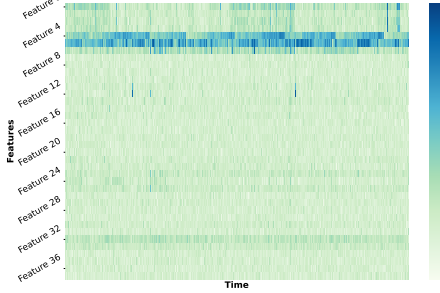

(e) Time series data with noise weight 15%.

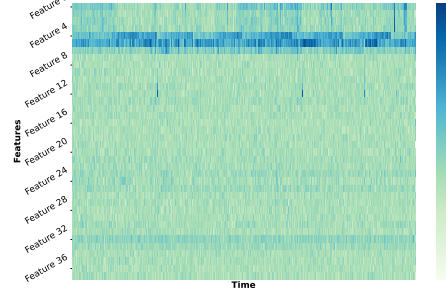

(f) Time series data with noise weight 20%.

Figure 12: Visualization for original data and noise-effect data on SMD.

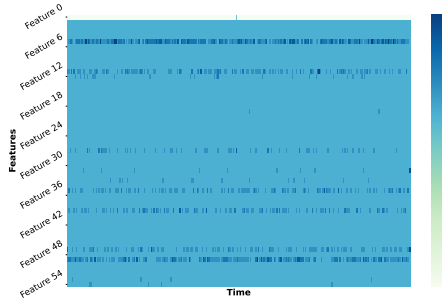

(a) Original time series data.

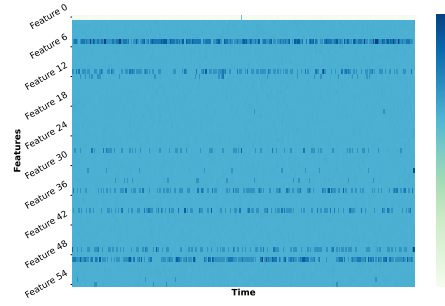

(b) Time series data with noise weight 1%.

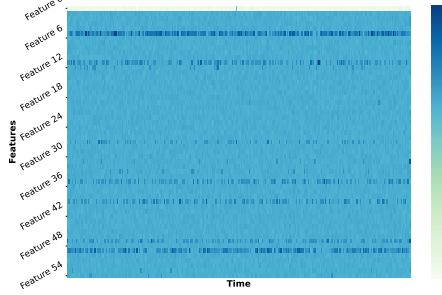

(c) Time series data with noise weight 5%.

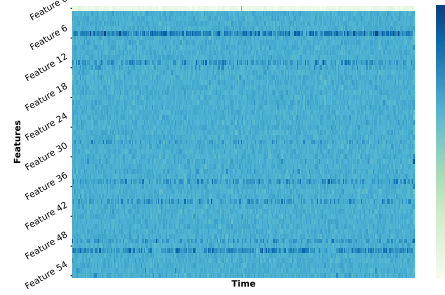

(d) Time series data with noise weight 10%.

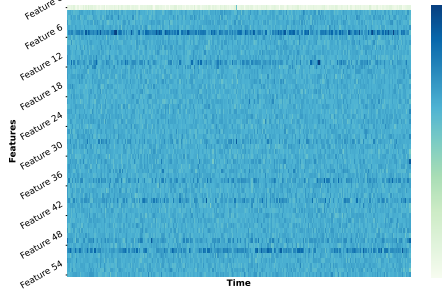

(e) Time series data with noise weight 15%.

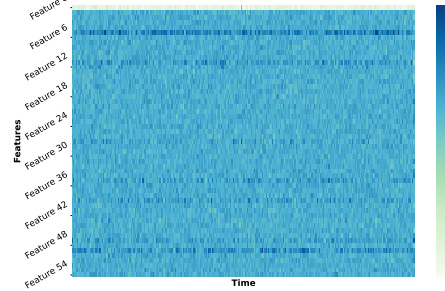

(f) Time series data with noise weight 20%.

Figure 13: Visualization for original data and noise-effect data on MSL.



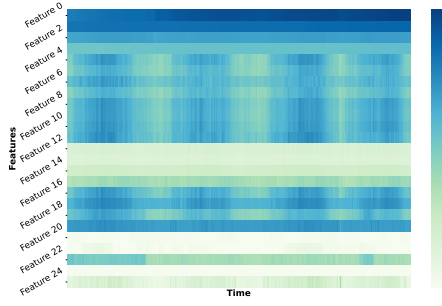

(a) Original time series data.

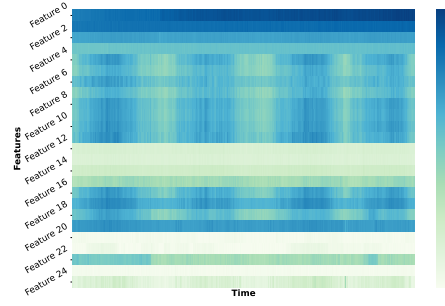

(b) Time series data with noise weight 1%.

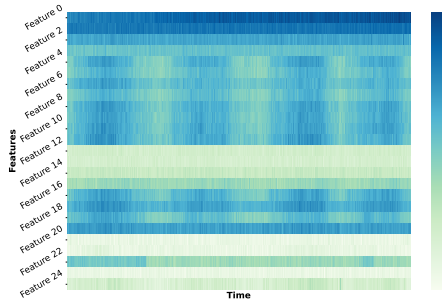

(c) Time series data with noise weight 5%.

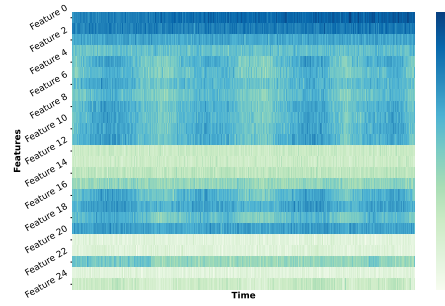

(d) Time series data with noise weight 10%.

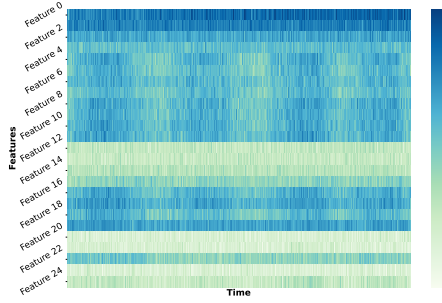

(e) Time series data with noise weight 15%.

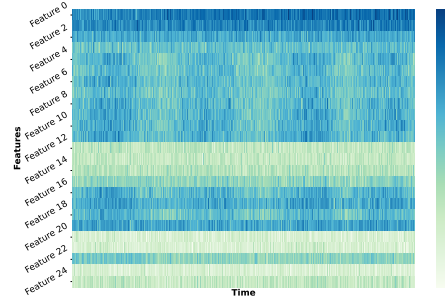

(f) Time series data with noise weight 20%.

Figure 14: Visualization for original data and noise-effect data on PSM.

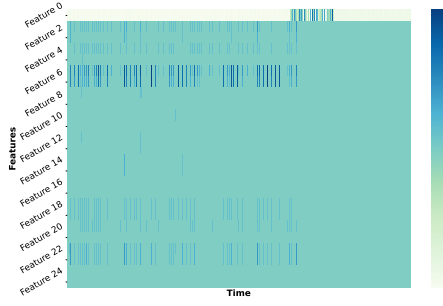

(a) Original time series data.

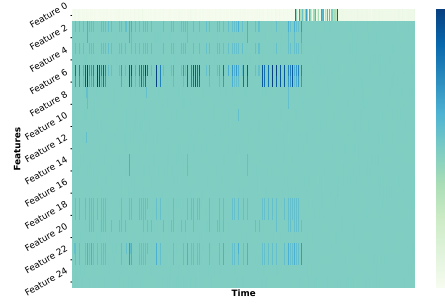

(b) Time series data with noise weight 1%.

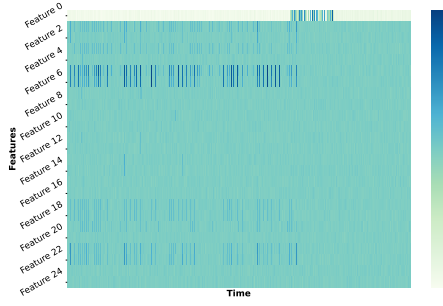

(c) Time series data with noise weight 5%.

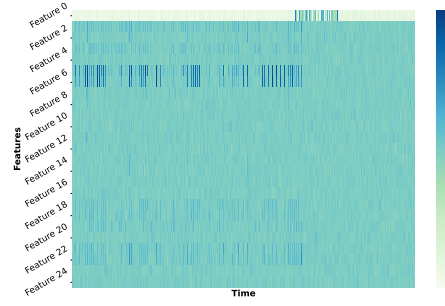

(d) Time series data with noise weight 10%.

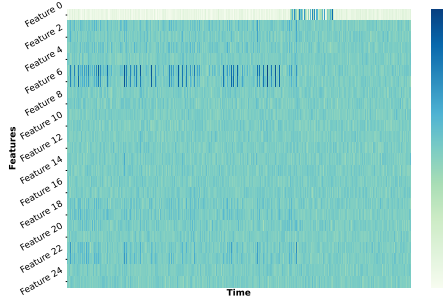

(e) Time series data with noise weight 15%.

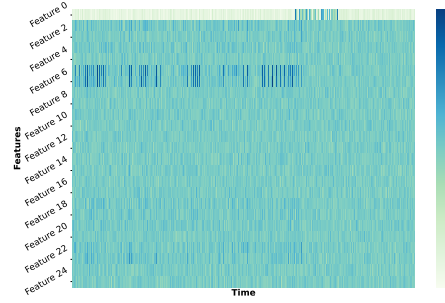

(f) Time series data with noise weight 20%.

Figure 15: Visualization for original data and noise-effect data on SMAP.

## E.6 Nyquist Criteria

We perturbed the time series data in the frequency domain to balance robustness and sensitivity in our experiments. This indicates that we should perform more analysis in the frequency domain to support this strategy. The **Nyquist Criterion** establishes a fundamental requirement for faithful reconstruction of a continuous-time signal from its discrete samples. This principle underpins modern digital signal processing systems, analog-to-digital conversion, and telecommunications. The theorem originated from Harry Nyquist's work in [37] and was later rigorously formalized by Claude Shannon in information theory [45]. It states that a band-limited signal with no frequency components exceeding  $f_{\max}$  (Hz) must be sampled at a rate  $f_s \geq 2f_{\max}$  to avoid aliasing and ensure complete signal recovery. We conclude the key concepts in this theory as follows:

- The minimum sampling rate  $2f_{\max}$  is termed the **Nyquist rate**.
- Half of the sampling frequency  $\frac{f_s}{2}$  is referred to as the **Nyquist frequency**,  $f_{\text{Nyq}}$ .
- Spectral overlap, i.e., **aliasing**, may occur if  $f_s < 2f_{\max}$  or  $f_{\text{Nyq}} < f_{\max}$ , causing irreversible distortion.

To verify compliance with the Nyquist-Shannon sampling theorem, the proposed procedure shown in Alg.1 first determines the sampling rate  $f_s$  and the corresponding Nyquist frequency  $f_{\text{Nyq}}$  from a user-provided sampling frequency descriptor for the input multivariate time series dataset  $\mathbf{D}$ . For each time series feature within  $\mathbf{D}$ , its frequency spectrum is obtained by the Fast Fourier Transform (FFT). The significant frequency components are then identified by comparing their normalized magnitudes against a relative threshold based on the peak magnitude in the spectrum. If the highest significant frequency detected in any feature exceeds  $f_{\text{Nyq}}$ , the dataset is flagged as non-compliant; otherwise, compliance is affirmed.

---

### Algorithm 1 Nyquist Criterion Compliance Verification

---

```

1: Input:
    • Multivariate time series dataset  $\mathbf{D} \in \mathbb{R}^{n \times k}$  ( $n$  instances,  $k$  variables)
    • Sampling frequency descriptor  $f_{\text{desc}}$  (e.g., "1 min")
2: Output: Boolean compliance status flagNyq
3: procedure CHECKNYQUIST( $\mathbf{D}, f_{\text{desc}}$ )
4:   Compute sampling rate:  $f_s = 1/\Delta t$  according to  $f_{\text{desc}}$  ▷ Unit: Hz
5:   Calculate Nyquist frequency:  $f_{\text{Nyq}} = f_s/2$ 
6:   for each feature column  $\mathbf{d}_i \in \mathbf{D}$  (where  $i$  is the feature index) do
7:     Let  $N_s = |\mathbf{d}_i|$  be the number of samples in the current feature column.
8:     Compute FFT:  $\mathbf{Y}_i = \mathcal{F}(\mathbf{d}_i)$ 
9:     Generate frequency axis (positive frequencies):  $\mathbf{f}_i = \text{fftfreq}(N_s, \Delta t)[0 : N_s/2]$ 
10:    Compute normalized magnitude:  $\mathbf{A}_i = |\mathbf{Y}_i[0 : N_s/2]|/N_s$ 
11:    Detect significant frequencies:
        
$$\mathcal{F}_{\text{sig}} = \{f \in \mathbf{f}_i \mid A(f) > 0.1 \cdot \max(\mathbf{A}_i)\}$$

12:    if  $\mathcal{F}_{\text{sig}} = \emptyset$  then
13:      Continue ▷ No significant frequencies above threshold for this feature
14:    if  $\max(\mathcal{F}_{\text{sig}}) > f_{\text{Nyq}}$  then
15:      return False ▷ Violation: Max significant frequency exceeds Nyquist frequency
16:  return True ▷ All features comply with Nyquist criterion

```

---

From the study [50], we can get the information that the selected datasets in our experiments, SMD, MSL, PSM and SMAP, are sampled with a sampling frequency of 1 min, so we set  $f_s = 60$  according to the unit in seconds. **After verification, all datasets in our experiments satisfy the Nyquist criterion.** Further, due to the space constraints on each page, we visualized the validation results for the first eight variables of each dataset from Fig.16 to Fig.19. The full validation codes can be found in our anonymized repository and run directly to carry out and check the results of full verification.

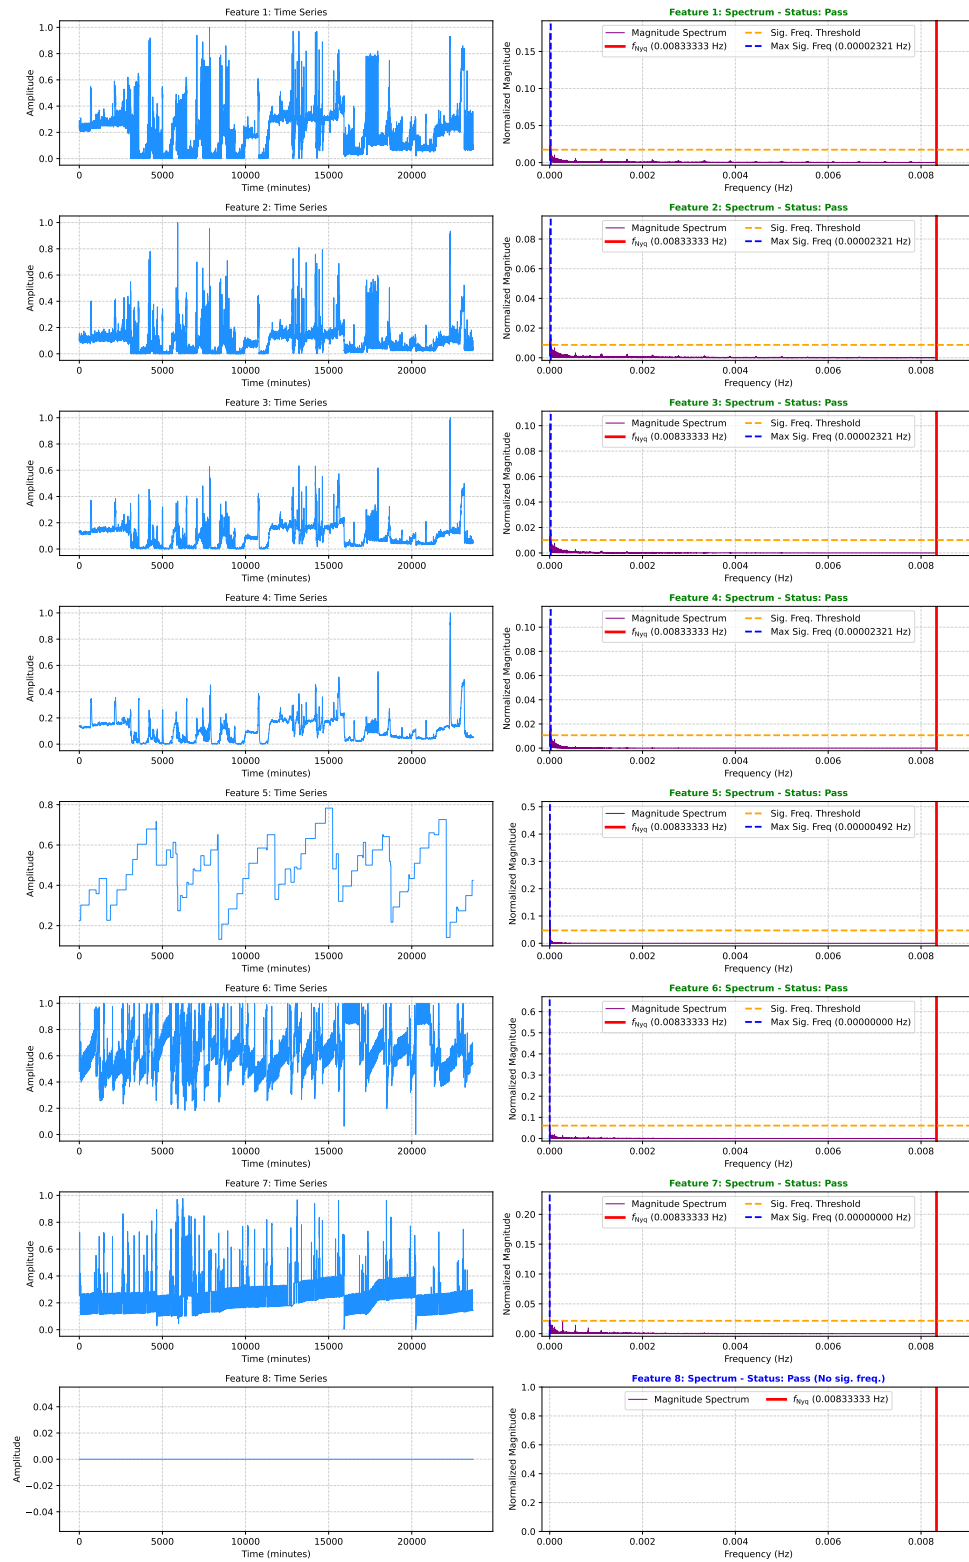

Figure 16: Nyquist criteria verification on SMD.

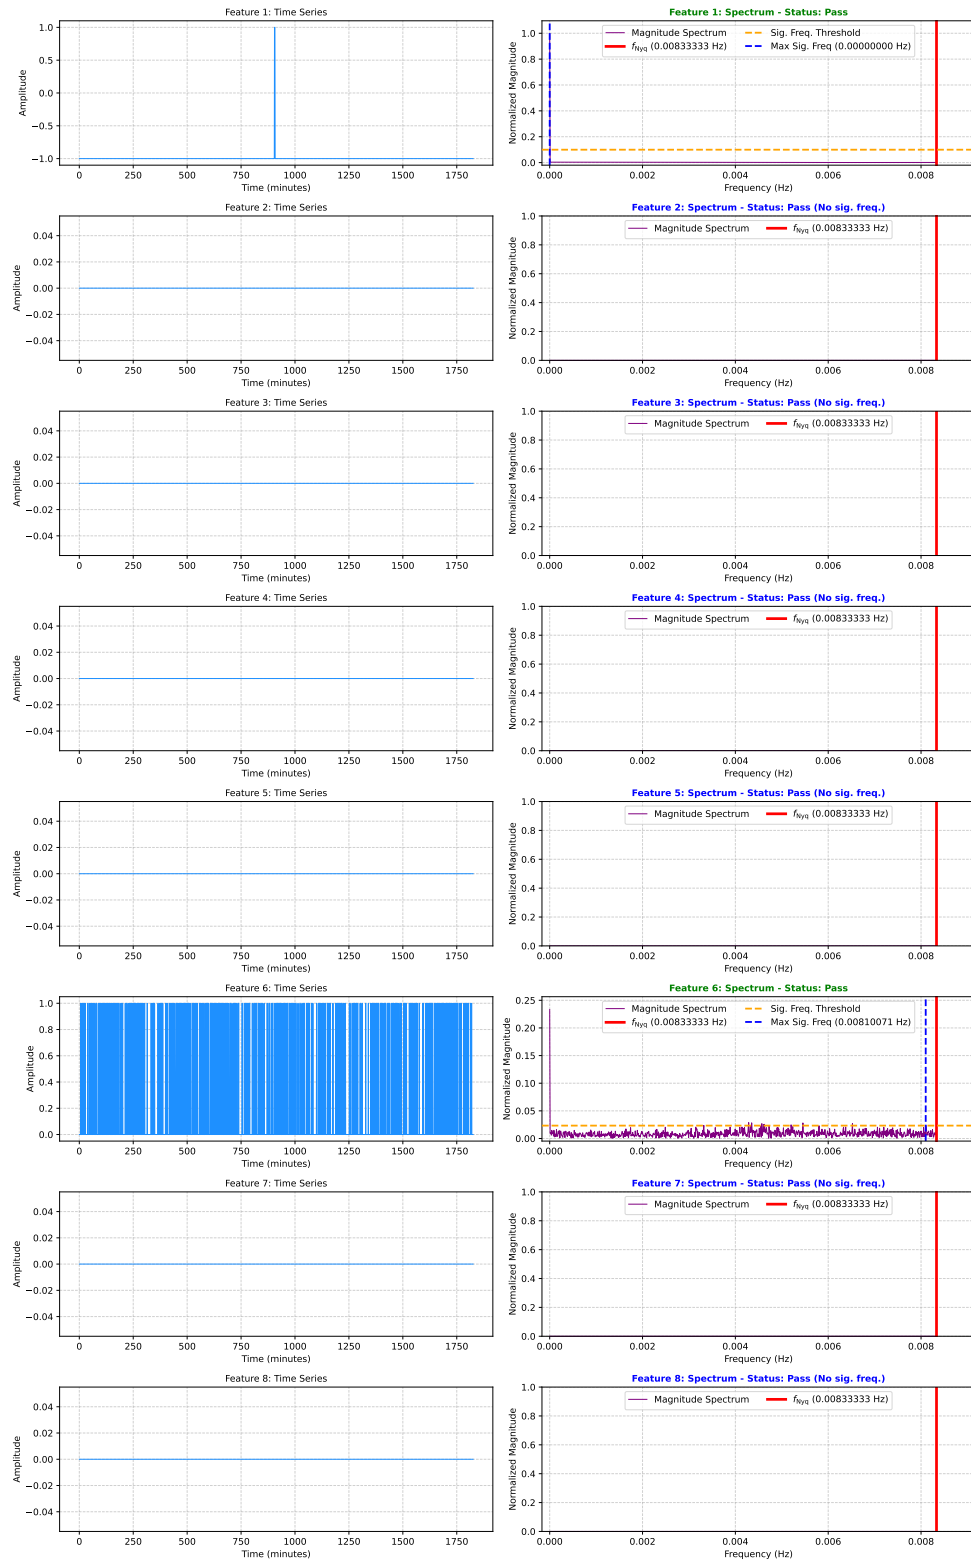

Figure 17: Nyquist criteria verification on MSL.

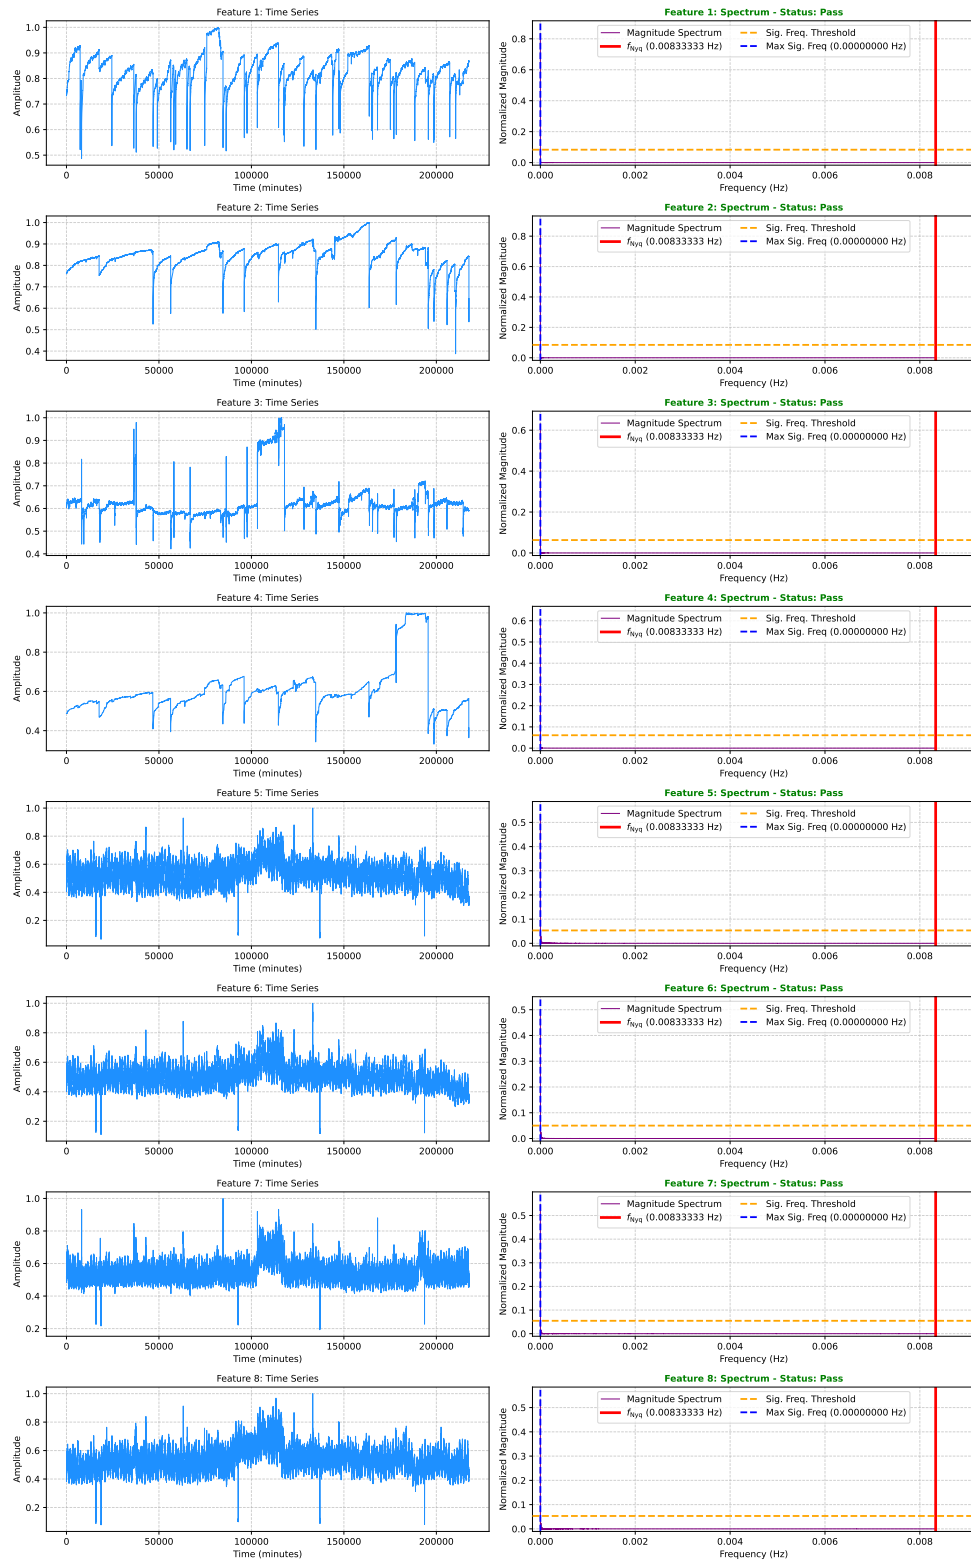

Figure 18: Nyquist criteria verification on PSM.

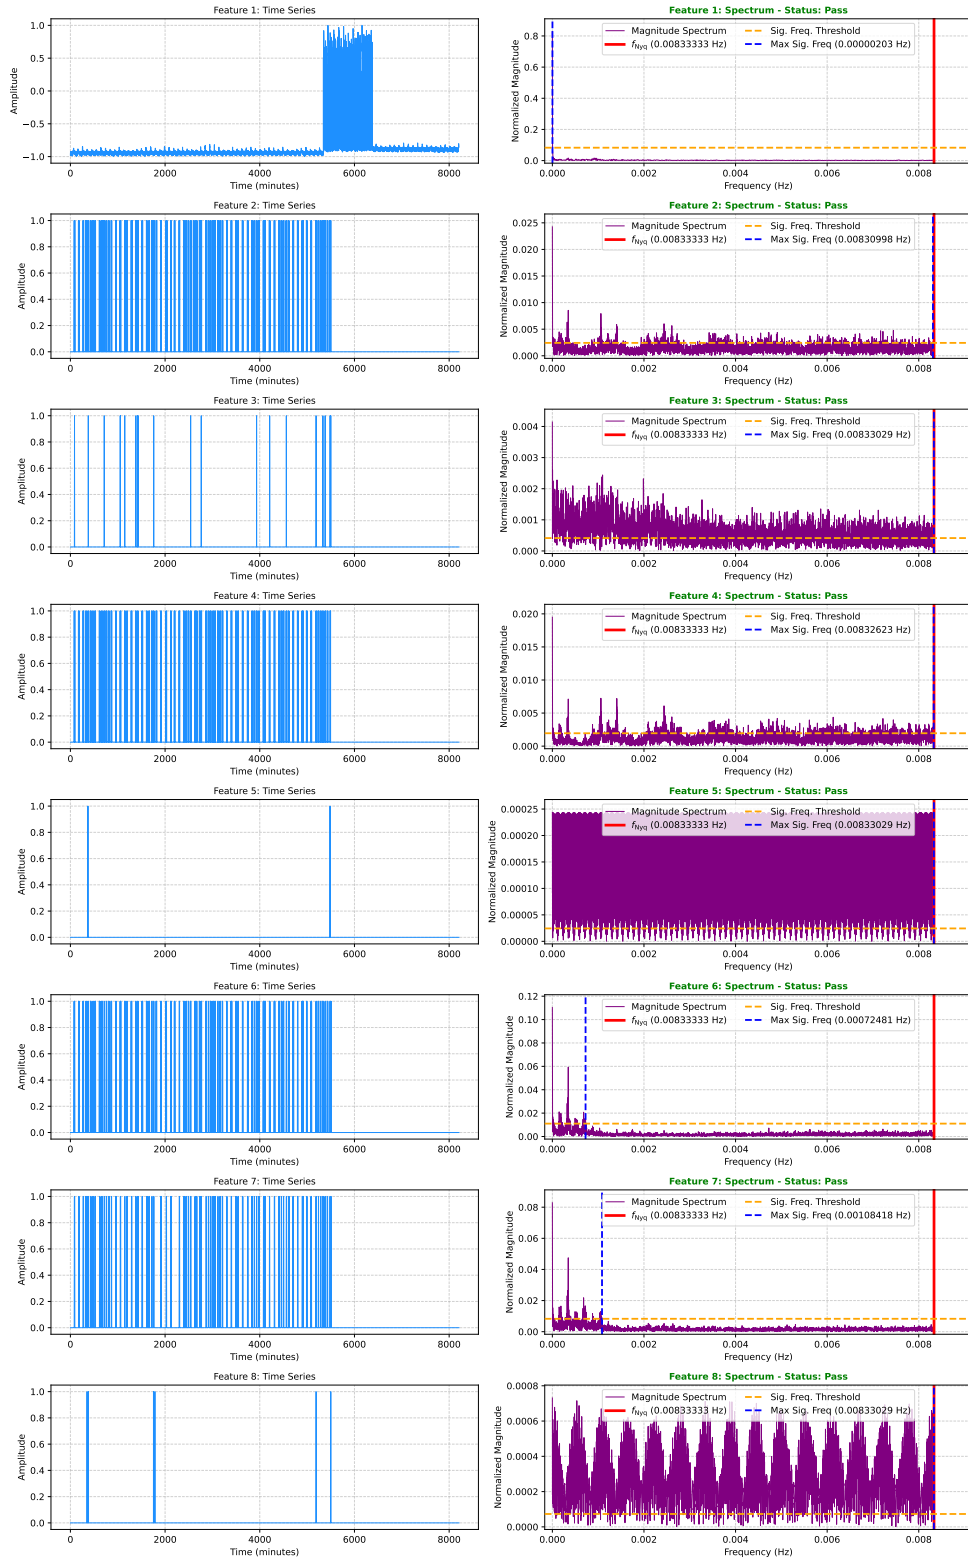

Figure 19: Nyquist criteria verification on SMAP.

### E.7 Comparison with Contrastive-based Models

As shown in Tab.1, noticeable improvements can be observed for different models. In this section, our aim is to explain that **reconstruction-based methods are also competitive candidates, so it is necessary to further optimize for better performance when conducting MTS AD**. Given these, we compare selected reconstruction-based methods with contrastive-based models, including DCdetector [66], TS-TCC [15] and CoST [57], which are also powerful tools in recent years. The results are listed in Tab.18. The results indicate that many reconstruction-based methods also outperform contrastive-based methods and become more competitive under the effect of IGAD.

Table 18:  $\overline{\text{VUS-PR}}$  under five random seeds for contrastive learning model.  $\dagger$  denotes the average value of all the mean values reported in Tab.1.

| Model      | Dataset |        |        |        |
|------------|---------|--------|--------|--------|
|            | SMD     | MSL    | PSM    | SMAP   |
| DCdetector | 0.0210  | 0.0096 | 0.1117 | 0.1508 |
| TS-TCC     | 0.0221  | 0.0088 | 0.1064 | 0.1491 |
| CoST       | 0.0217  | 0.0228 | 0.1118 | 0.1459 |

  

| Model                                         | Dataset                           |                                   |                                   |                                   |
|-----------------------------------------------|-----------------------------------|-----------------------------------|-----------------------------------|-----------------------------------|
|                                               | SMD                               | MSL                               | PSM                               | SMAP                              |
| Mean of Contrastive-based Methods             | 0.0216                            | 0.0137                            | 0.1010                            | 0.1486                            |
| Mean of Reconstruction-based Methods w/o IGAD | 0.1554 $\dagger$                  | 0.0416 $\dagger$                  | 0.1542 $\dagger$                  | 0.3223 $\dagger$                  |
| Mean of Reconstruction-based Methods w/ IGAD  | <b>0.1752<math>\dagger</math></b> | <b>0.0920<math>\dagger</math></b> | <b>0.1592<math>\dagger</math></b> | <b>0.4056<math>\dagger</math></b> |



## E.8 Codes for IGAD

For better understanding of IGAD, we also provide a pseudo-code block to help better describe the IGAD working flow during the training process, as shown in Code.1.

---

```
1  # First, we define:
2  # f: The training model initialized by f =
   ↪ Model(parameters...).to(device)
3  # f_copy (the defined f'): The frozen model initialized by
4  # f_copy = Model(parameters...).requires_grad(False).to(device)
5  def train_in_a_single_iteration(f, f_copy, data):
6
7      # f_copy is the frozen of current training model
8      f_copy.load_state_dict(f.state_dict())
9
10     recon_data = f(data)
11
12     z = get_augumented_data(data) # Get z^i for x^i
13     fz = f(z) # f(z^i)
14     f_z = fz.detach() # f'(z^i)
15     ff_z = f(f_z) # f(f'(z^i))
16     f_fz = f_copy(fz) # f'(f(z^i))
17
18     # Calculate losses
19     loss_rec = (recon_data - data).pow(2) # Reconstruction
20     loss_idem = (f_fz - fz).pow(2) # Idempotent
21     loss_tight = -(ff_z - f_z).pow(2) # Tightness
22     # loss_auxiliary if exists
23
24     # Optimize for losses
25     loss = lambda_rec * loss_rec + lambda_idem * loss_idem +
   ↪ lambda_tight * loss_tight # loss_auxiliary if exists
26     opt.zero_grad()
27     loss.backward()
28     opt.step()
```

---

Listing 1: Python implementation for IGAD.

## F Limitation and Future Work

Although significant improvements have been observed, there remain unexplained performance drops in a limited number of experiments. This warrants further investigation to identify the underlying causes. Meanwhile, the slightly larger standard deviation observed in certain cases suggests the need to optimize the training process to achieve more stable convergence in our future work. The workflow of IGAD also inspires us to explore potential strategies to reduce computational complexity for large models, such as OFA [74].

## G Impact Statements

This paper presents work focused on advancing the field of multivariate time series anomaly detection, with applications in healthcare, finance, and industrial monitoring. Although the ethical implications of anomaly detection are generally well-established, the misuse of such methods in sensitive areas could lead to privacy concerns and unintended biases in decision-making. We believe that this research contributes to improving anomaly detection techniques, improving system reliability, and early warning capabilities. Specific ethical issues are not identified beyond these general considerations.
